# Supplementary material for: The stereoselective construction of E- and Z-Δ-Ile from E-dehydroamino acid ester: the synthesis of the phomopsin A tripeptide side chain
Source: Royal Society of Chemistry journal article supplement (doi:10.1039/c5cc08458j), 2015-11-27

## Supporting information

### **A Stereoselective Construction of *E*- and *Z*- $\Delta$ -Ile from *E*-Dehydroamino Acid Ester: the Synthesis of Phomopsin A Tripeptide Side Chain**

**Yoko Yasuno, Akito Nishimura, Yoshifumi Yasukawa, Yuma Karita,  
Yasufumi Ohfuné and Tetsuro Shinada\***

**Graduate School of Science, Osaka City University,  
3-3-138, Sugimoto, Sumiyoshi, Osaka 558-8585, Japan**

## General.

All reagents and solvents were purchased from either Aldrich Chemical Company, Inc., Kanto Kagaku Co., Inc., Merck & Co., Inc., Nacalai Tesque Company, Ltd., Peptide Institute, Tokyo Kasei Kogyo Co., Ltd., or Wako Pure Chemical Industries, Ltd., and used without further purification unless otherwise indicated. Dichloromethane ( $\text{CH}_2\text{Cl}_2$ ) was distilled from phosphoric pentoxide ( $\text{P}_2\text{O}_5$ ). Tetrahydrofuran (THF), chloroform ( $\text{CHCl}_3$ ), and dimethylformamide (DMF) of anhydrous grade were used.

Optical rotations were taken on a JASCO P-1030 polarimeter with a sodium lamp (D line). Melting points were determined with a Yanaco MP-21 melting point apparatus and were uncorrected. FTIR spectra were measured on a JASCO FT/IR-6200 infrared spectrophotometer.  $^1\text{H}$  NMR spectra were recorded on an either Bruker AVANCE 300 (300 MHz), JEOL JNM-LA 400 (400 MHz), or Bruker AVANCE 600 (600 MHz) spectrometer. Chemical shifts of  $^1\text{H}$  NMR were reported in parts per million (ppm,  $\delta$ ) relative to  $\text{CHCl}_3$  ( $\delta = 7.26$ ) in  $\text{CDCl}_3$ ,  $\text{CD}_2\text{HOD}$  ( $\delta = 3.31$ ).  $^{13}\text{C}$  NMR spectra were recorded on an either Bruker AVANCE 300 (75 MHz), JEOL JNM-LA 400 (100 MHz), or Bruker AVANCE 600 (150 MHz) spectrometer. Chemical shifts of  $^{13}\text{C}$  NMR were reported in ppm ( $\delta$ ) relative to  $\text{CHCl}_3$  ( $\delta = 77.0$ ) in  $\text{CDCl}_3$ . Low resolution mass spectra (LRMS) and high resolution mass spectra (HRMS) were obtained on a JEOL JMS-AX500 for fast atom bombardment ionization (FAB), chemical ionization (CI), or electron ionization (EI). All reactions were monitored by thin layer chromatography (TLC), which was performed with precoated plates (silica gel 60 F-254, 0.25 mm thickness, manufactured by Merck). TLC visualization was accompanied using UV lamp (254 nm) or a charring solution (ethanoic phosphomolybdic acid, aqueous potassium permanganate and butanoic ninhydrin). Daisogel IR-60 1002W (40/63  $\mu\text{m}$ ) was used for flash column chromatography on silica gel.

Compounds **7**, **9**, and **23** were obtained as an inseparable mixture. Amide rotamers are observed in compounds **7~9** and **18~23** under the NMR analysis conditions. These NMR signals are broaden and complicated. Therefore, NMR data assignments are not given for these compounds. Instead, actual spectra are provided.

### Methyl 2-(((benzyloxy)carbonyl)amino)pent-2-enoate (**11**)

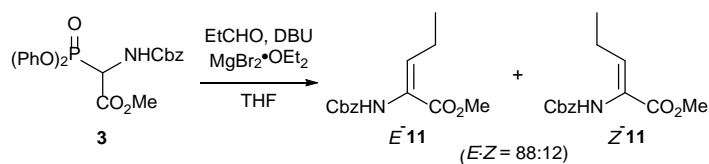

To a solution of **3**<sup>1</sup> (502 mg, 1.10 mmol) and MgBr<sub>2</sub>·OEt<sub>2</sub> (258 mg, 1.00 mmol) in THF (10 mL) was added DBU (150 μL, 1.00 mmol) at 0 °C under argon. The mixture was stirred for 30 min at 0 °C, then propionaldehyde (76 μL, 1.00 mmol, 95% purity) was added to the mixture. The mixture was stirred for 12 h at room temperature, quenched with sat. NH<sub>4</sub>Cl (10 mL), and extracted with EtOAc (10 mL × 3). The combined organic layers were washed with brine (30 mL), dried over anhydrous MgSO<sub>4</sub>, and filtered. The filtrate was concentrated under reduced pressure. The residue was purified by flash column chromatography on silica gel (hexane/EtOAc = 20 : 1 to 7 : 1) to give a *E/Z* mixture of **11** (229 mg, 87%, *E* : *Z* = 88 : 12) as a colorless oil. The *E/Z* ratio was determined by comparison of the chemical shift values of the olefinic (*E*: 6.79 ppm, *Z*: 6.63 ppm) and N-H (*E*: 6.79 ppm, *Z*: 6.15 ppm) protons.<sup>2</sup> NMR data of *E/Z* -**11** were identical to those of the reported data.<sup>3</sup>

### (*Z*)-Methyl 2-(((benzyloxy)carbonyl)amino)-3-iodopent-2-enoate (**Z-12**)

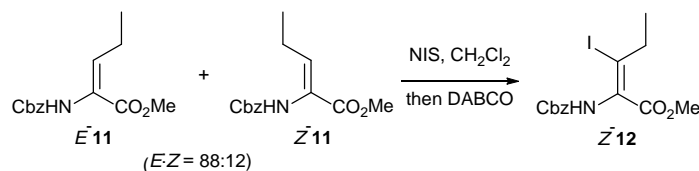

To a solution of **11** (229 mg, 870 μmol, *E* : *Z* = 88 : 12) in CH<sub>2</sub>Cl<sub>2</sub> (8.7 mL) was added NIS (234 mg, 1.04 mmol) at 0 °C under argon. The mixture was stirred at room temperature for 2 h. DABCO (195 mg, 1.74 mmol) was added to the mixture at 0 °C. The mixture was stirred for 16 h at room temperature and quenched with 1*N* NaHSO<sub>4</sub> (10 mL). The organic layer was separated. The aqueous layer was extracted with EtOAc (10 mL × 2). The combined organic layers were washed with sat. Na<sub>2</sub>SO<sub>3</sub> (30 mL) and brine (30 mL), dried over anhydrous MgSO<sub>4</sub>, and filtered. The filtrate was concentrated under reduced pressure. The residue was purified by flash column chromatography on silica gel (hexane/EtOAc = 15 : 1) to give **Z-12** (292 mg, 86%).

White solid;

mp 75–77 °C;

FTIR (neat) 3318, 2973, 2952, 1726, 1622, 1481, 1304, 1267, 1220, 1039 cm<sup>-1</sup>;

<sup>1</sup>H NMR (400 MHz, CDCl<sub>3</sub>) δ 7.37-7.32 (m, 5 H), 6.41 (brs, 1 H), 5.14 (s, 2 H), 3.82 (brs, 3 H), 2.76 (brq, *J* = 7.3 Hz, 2 H), 1.13 (t, *J* = 7.3 Hz, 3 H);

<sup>13</sup>C NMR (100 MHz, CDCl<sub>3</sub>) δ 161.6, 153.2, 135.4, 130.6, 128.5, 128.3, 128.2, 109.3, 67.7, 52.5, 33.8, 14.8;

HRMS (FAB) calcd for C<sub>14</sub>H<sub>17</sub>INO<sub>4</sub> *m/z* 390.0202 [M+H]<sup>+</sup>, found 390.0201.

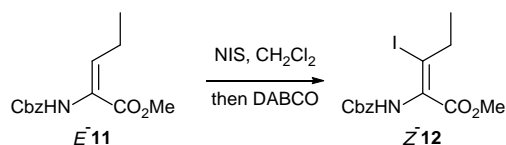

According to the same procedure, *E*-**11** (156 mg, 593 μmol) purified from the 88:12 *E/Z*-mixture of **11** by repeating silicagel column chromatography was subjected to the iodination reaction to give *Z*-**12** (191 mg, 83%). Spectroscopic data of the resulting *Z*-**12** was identical with those of *Z*-**12** described above.

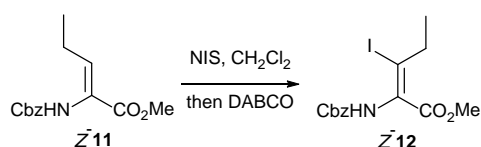

According to the same procedure, *Z*-**11** (157 mg, 596 μmol) purified from the 88:12 mixture of *E/Z*-**11** by repeating silicagel column chromatography was subjected to the iodination reaction to give *Z*-**12** (172 mg, 74%). Spectroscopic data of the resulting *Z*-**12** was identical with those of *Z*-**12** described above.

#### *(E)*-Methyl 2-(((benzyloxy)carbonyl)amino)-3-methylpent-2-enoate (*E*-**13**)

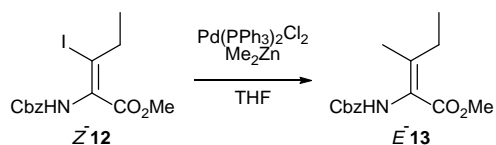

To a solution of *Z*-**12** (20.0 mg, 51.4 μmol) and Pd(PPh<sub>3</sub>)<sub>2</sub>Cl<sub>2</sub> (1.8 mg, 2.6 μmol) in THF (0.5 mL) was added Me<sub>2</sub>Zn (100 μL, 102 μmol, 1.02 M solution in hexane) at 0 °C under argon. The mixture was stirred for 13 h at room temperature, quenched with sat. NH<sub>4</sub>Cl (5 mL), and extracted with EtOAc (5 mL × 3). The combined organic layers were washed with brine (15 mL), dried over anhydrous MgSO<sub>4</sub> and filtered. The filtrate was concentrated under reduced pressure. The residue was purified by flash column chromatography on silica gel (hexane/EtOAc = 12 : 1 to 3 : 1) to give *E*-**13** (13.2 mg, 93%) as a 7 : 2 mixture of rotamers. Stereochemistry of *E*-**13** was determined by NOESY analysis shown in P13. <sup>13</sup>C NMR of *E*-**13** was identical with that of the reported data.<sup>4</sup>

White solid;

<sup>1</sup>H NMR (600 MHz, CDCl<sub>3</sub>) δ 7.37–7.33 (m, 5 H), 5.95 (brs, 7/9H), 5.64 (brs, 2/9H), 5.14 (s, 2 H), 3.74 (brs, 21/9H), 3.53 (brs, 6/9H), 2.52 (q, *J* = 7.2 Hz, 2 H), 1.86 (s, 3 H), 1.10 (brt, *J* = 7.2 Hz, 3 H);

<sup>13</sup>C NMR (75 MHz, CDCl<sub>3</sub>) δ 164.9, 154.4, 149.7, 136.0, 128.1, 127.74, 127.68, 120.7, 66.6, 51.3, 27.2, 19.0, 12.3.

### (Z)-Methyl 2-(((benzyloxy)carbonyl)amino)-3-iodobut-2-enoate (**Z-15**)

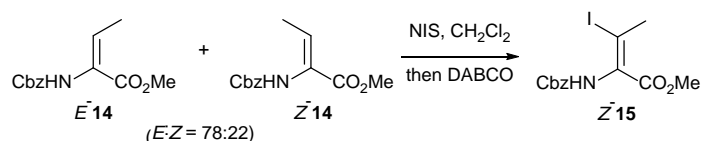

According to the literature,<sup>2</sup> **14** (*E* : *Z* = 78 : 22) was prepared by condensation of **3** and acetaldehyde. To a solution of **14**<sup>2</sup> (10.0 mg, 40.1  $\mu\text{mol}$ , *E* : *Z* = 78 : 22) in  $\text{CH}_2\text{Cl}_2$  (2.0 mL) was added NIS (10.8 mg, 48.0  $\mu\text{mol}$ ) at 0 °C under argon. The mixture was stirred at room temperature for 2 h. DABCO (8.97 mg, 80.0  $\mu\text{mol}$ ) was added to the mixture at 0 °C. The mixture was stirred for 7 h at room temperature. The reaction was quenched with 1N  $\text{NaHSO}_4$  (5 mL) and extracted with EtOAc (5 mL  $\times$  3). The combined organic layers were washed with sat.  $\text{Na}_2\text{SO}_3$  (15 mL) and brine (15 mL), dried over anhydrous  $\text{MgSO}_4$ , and filtered. The residue was purified by flash column chromatography on silica gel (hexane/EtOAc = 15 : 1 to 3 : 1) to give **Z-15** (9.5 mg, 63%).

White solid;

FTIR (neat) 3324, 2952, 1724, 1626, 1483, 1305, 1229, 1049  $\text{cm}^{-1}$ ;

<sup>1</sup>H NMR (400 MHz,  $\text{CDCl}_3$ )  $\delta$  7.36 (m, 5 H), 6.35 (brs, 1 H), 5.14 (s, 2 H), 3.81 (brs, 3 H), 2.76 (s, 3 H);

<sup>13</sup>C NMR (100 MHz,  $\text{CDCl}_3$ )  $\delta$  161.4, 153.4, 135.5, 131.2, 128.6, 128.4, 128.3, 101.1, 67.8, 52.6, 29.1;

HRMS (EI) calcd for  $\text{C}_{13}\text{H}_{14}\text{INO}_4$   $m/z$  374.9968 [ $\text{M}^+$ ]<sup>+</sup>, found 374.9977.

### (Z)-Methyl 2-(((benzyloxy)carbonyl)amino)-3-methylpent-2-enoate (**Z-13**)

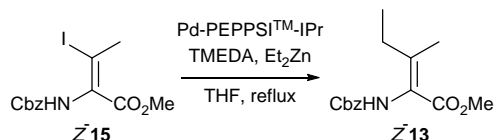

To a solution of **Z-15** (28.9 mg, 77.0  $\mu\text{mol}$ ), Pd-PEPPSI<sup>TM</sup>-IPr (2.7 mg, 3.85  $\mu\text{mol}$ , 98% purity) and TMEDA (46  $\mu\text{L}$ , 308  $\mu\text{mol}$ ) in THF (770  $\mu\text{L}$ ) was added  $\text{Et}_2\text{Zn}$  (154  $\mu\text{L}$ , 154  $\mu\text{mol}$ , 1.0 M solution in hexane) at 0 °C under argon. The mixture was stirred for 20 min at reflux, quenched with sat.  $\text{NH}_4\text{Cl}$  (5 mL), and extracted with EtOAc (5 mL  $\times$  3). The combined organic layers were washed with brine (15 mL), dried over anhydrous  $\text{MgSO}_4$ , and filtered. The filtrate was concentrated under reduced pressure. The residue was purified by flash column chromatography on silica gel (hexane/EtOAc = 10 : 1 to 6 : 1) to give **Z-13** (20.8 mg, 98%) as a 3 : 1 mixture of rotamers. Stereochemistry of **Z-13** was determined by NOESY analysis shown in P14. <sup>13</sup>C NMR of **Z-13** was identical with that of the reported data.<sup>4</sup>

White solid;

<sup>1</sup>H NMR (600 MHz,  $\text{CDCl}_3$ )  $\delta$  7.37–7.33 (m, 5 H), 5.88 (brs, 3/4H), 5.65 (brs, 1/4H), 5.14 (s, 2 H), 3.74 (brs, 9/4H), 3.51 (brs, 3/4 H), 2.24 (q,  $J$  = 7.6 Hz, 2 H), 2.12 (s, 3 H), 1.04 (brt,  $J$  = 7.6 Hz, 3 H);

<sup>13</sup>C NMR (75 MHz,  $\text{CDCl}_3$ )  $\delta$  165.4, 154.9, 150.6, 136.2, 128.1, 127.7, 120.5, 66.7, 51.4, 28.1, 18.2, 11.2.

**(2S)-tert-Butyl 2-((1-(diphenoxyphosphoryl)-2-methoxy-2-oxoethyl)carbamoyl)-2,5-dihydro-1H-pyrrole-1-carboxylate (7)**

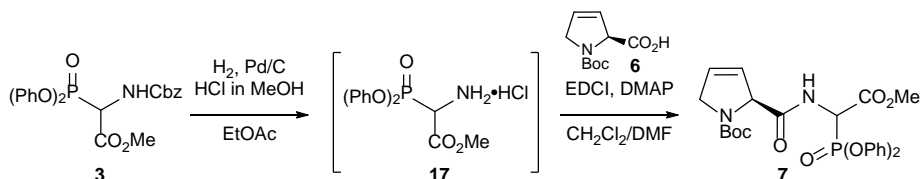

To a solution of **3**<sup>1</sup> (1.00 g, 2.20 mmol) in EtOAc (20 mL) was added methanolic HCl prepared from methanol (7.3 mL) and AcCl (1.2 mL, 16.5 mmol) at 0 °C. 10% Pd/C (100 mg, 10 wt%) was then added to the mixture. The mixture was stirred under hydrogen for 3.5 h at room temperature and filtrated through a thin Celite<sup>®</sup> pad. The filtrate was concentrated under reduced pressure to give crude ammonium salt **17** which was subjected to the next acylation without further purification. **6**<sup>5</sup> (422 mg, 1.98 mmol), DMAP (134 mg, 1.10 mmol), and EDCI (464 mg, 2.42 mmol) were added to a solution of the crude **17** in CH<sub>2</sub>Cl<sub>2</sub>/DMF (2 : 1, 21 mL) at 0 °C under argon. The mixture was stirred for 13 h at room temperature, quenched with sat. NH<sub>4</sub>Cl (25 mL), and extracted with EtOAc (25 mL × 3). The combined organic layers were washed with brine (75 mL), dried over anhydrous MgSO<sub>4</sub>, and filtered. The filtrate was concentrated under reduced pressure. The residue was purified by column chromatography on silica gel (hexane/EtOAc = 5 : 1 to 1 : 1) to give **7** (618 mg, 55% over 2 steps) as a 1 : 1 inseparable mixture of diastereomers.

Colorless amorphous solid;

FTIR (neat) 3278, 3064, 2978, 2931, 2869, 1750, 1696, 1590, 1524, 1149, 1456, 1436, 1401, 1366, 1311, 1281, 1205, 1181, 1162, 1119, 1025, 1009 cm<sup>-1</sup>;

HRMS (FAB) calcd for C<sub>25</sub>H<sub>30</sub>N<sub>2</sub>O<sub>8</sub>P *m/z* 517.1740 [M+H]<sup>+</sup>, found 517.1746.

<sup>1</sup>H and <sup>13</sup>C NMR spectra: see P15~16.

**(S,E)-tert-Butyl 2-((1-methoxy-1-oxopent-2-en-2-yl)carbamoyl)-2,5-dihydro-1H-pyrrole-1-carboxylate (E-18) and (S,Z)-tert-Butyl 2-((1-methoxy-1-oxopent-2-en-2-yl)carbamoyl)-2,5-dihydro-1H-pyrrole-1-carboxylate (Z-18)**

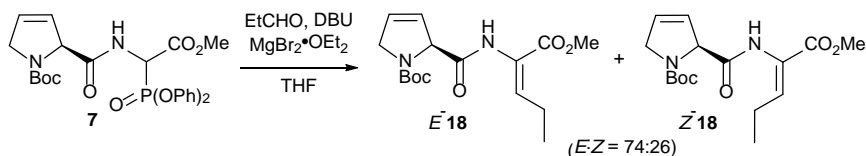

To a solution of **7** (618 mg, 1.20 mmol) and MgBr<sub>2</sub>·OEt<sub>2</sub> (340 mg, 1.32 mmol) in THF (13 mL) was added DBU (181 μL, 1.32 mmol) at 0 °C under argon. The mixture was stirred for 30 min at 0 °C. Propionaldehyde (100 μL, 1.32 mmol, 95% purity) was added to the mixture. The mixture was stirred for 13 h at room temperature, quenched with sat. NH<sub>4</sub>Cl (20 mL), and extracted with EtOAc (20 mL × 3). The combined organic layers were washed with brine (45 mL), dried over anhydrous MgSO<sub>4</sub>, and filtered. The filtrate was concentrated under reduced pressure. The residue was purified by flash column chromatography

on silica gel (hexane/EtOAc = 7 : 1 to 1 : 1) to give **18** (354 mg, 91%, *E* : *Z* = 74 : 26). The *E/Z* ratio was determined by comparison of the chemical shift values of olefinic proton (*E*: 7.12 ppm, *Z*: 6.68 ppm).<sup>2</sup> *E*- and *Z*-**18** was partly separated by flash column chromatography on silica gel repeatedly (hexane/EtOAc = 7 : 1 to 1 : 1);

***E*-18:**

Colorless sticky oil, as a 4 : 3 mixture of rotamers;

$[\alpha]_D^{20} = -111.7$  (*c* 2.36, CHCl<sub>3</sub>);

FTIR (neat) 3351, 2976, 2034, 2873, 1681, 1521, 1436, 1392, 1366, 1317, 1245, 1220, 1164, 1125 cm<sup>-1</sup>;

<sup>1</sup>H NMR spectrum: see P17.

<sup>13</sup>C NMR (75 MHz, CDCl<sub>3</sub>) δ 168.7, 164.2, 154.7, 153.8, 134.7, 127.6, 126.1, 123.7, 80.7, 69.4, 68.4, 53.7, 52.0, 28.0, 21.5, 13.8;

HRMS (FAB) calcd for C<sub>16</sub>H<sub>25</sub>N<sub>2</sub>O<sub>5</sub> *m/z* 325.1763 [M+H]<sup>+</sup>, found 325.1752.

***Z*-18:**

White solid, as a 2 : 1 mixture of rotamers;

mp 44–45 °C;

$[\alpha]_D^{21} = -205.2$  (*c* 1.03, CHCl<sub>3</sub>);

FTIR (neat) 3279, 2974, 2935, 2874, 1682, 1504, 1437, 1394, 1366, 1312, 1275, 1249, 1173, 1126, 1085 cm<sup>-1</sup>;

<sup>1</sup>H NMR spectrum: see P19.

<sup>13</sup>C NMR (75 MHz, CDCl<sub>3</sub>) δ 168.7, 164.6, 154.9, 154.1, 140.4, 139.8, 127.7, 126.3, 126.0, 124.2, 123.4, 80.9, 69.0, 67.7, 53.9, 52.1, 28.0, 22.2, 21.9, 12.5;

HRMS (FAB) calcd for C<sub>16</sub>H<sub>25</sub>N<sub>2</sub>O<sub>5</sub> *m/z* 325.1763 [M+H]<sup>+</sup>, found 325.1758.

**(*S,Z*)-*tert*-Butyl 2-((3-iodo-1-methoxy-1-oxopent-2-en-2-yl)carbamoyl)-2,5-dihydro-1*H*-pyrrole-1-carboxylate (**19**)**

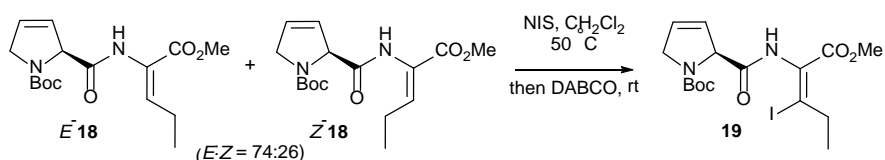

To a solution of **18** (638 mg, 2.78 mmol, *E* : *Z* = 74 : 26) in CHCl<sub>3</sub> (11 mL) was added NIS (490 mg, 2.18 mmol) at 0 °C under argon. The mixture was stirred at 50 °C for 3 h. DABCO (611 mg, 5.45 mmol) was added to the mixture at room temperature. The mixture was stirred for 11 h and quenched with 1*N* NaHSO<sub>4</sub> (15 mL). The organic layer was separated and the aqueous layer was extracted with EtOAc (15 mL × 2). The combined organic layers were washed with sat. Na<sub>2</sub>SO<sub>3</sub> (45 mL) and brine (45 mL), dried over

anhydrous  $\text{MgSO}_4$ , and filtered. The residue was purified by flash column chromatography on silica gel (hexane/EtOAc = 5 : 1 to 3 : 1) to give **19** (364 mg, 74%) as a 2 : 1 mixture of rotamers.

Colorless amorphous solid;

$[\alpha]_D^{17} = -117.3$  ( $c$  1.47,  $\text{CHCl}_3$ );

FTIR (neat) 3278, 2976, 2933, 2871, 1730, 1697, 1621, 1480, 1433, 1395, 1366, 1293, 1258, 1220, 1166, 1124, 1082  $\text{cm}^{-1}$ ;

$^1\text{H}$  NMR spectrum: see P21.

$^{13}\text{C}$  NMR (75 MHz,  $\text{CDCl}_3$ )  $\delta$  168.5, 161.4, 155.4, 154.0, 130.8, 130.0, 128.1, 127.6, 125.9, 109.7, 81.4, 68.8, 67.2, 54.0, 52.5, 33.5, 28.2, 14.8;

HRMS (FAB) calcd for  $\text{C}_{16}\text{H}_{24}\text{IN}_2\text{O}_5$   $m/z$  451.0730  $[\text{M}+\text{H}]^+$ , found 451.0729.

According to the same procedure, *E*-**18** (32.0 mg, 98.7  $\mu\text{mol}$ ) and *Z*-**18** (29.5 mg, 90.9  $\mu\text{mol}$ ) were converted to **19**, respectively [35.0 mg, 79% from *E*-**18**; 21.0 mg, 51% from *Z*-**18**].

**(*S,E*)-*tert*-Butyl 2-((1-methoxy-3-methyl-1-oxopent-2-en-2-yl)carbamoyl)-2,5-dihydro-1*H*-pyrrole-1-carboxylate (**8**)**

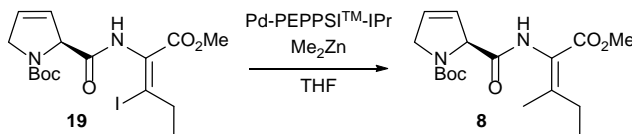

To a solution of **19** (840 mg, 1.87 mmol) and Pd-PEPPSI<sup>TM</sup>-IPr (38.8 mg, 56.0  $\mu\text{mol}$ , 98% purity) in THF (19 mL) was added Me<sub>2</sub>Zn (3.8 mL, 3.73 mmol, 0.99 M solution in hexane) at 0 °C under argon. The mixture was stirred for 1 h at room temperature, quenched with sat.  $\text{NH}_4\text{Cl}$  (30 mL), and extracted with EtOAc (20 mL  $\times$  3). The combined organic layers were wash with brine (60 mL), dried over anhydrous  $\text{MgSO}_4$  and filtered. The filtrate was concentrated under reduced pressure. The residue was purified by flash column chromatography on silica gel (hexane/EtOAc = 5 : 1 to 1 : 1) to give **8** (597 mg, 94%) as a 5 : 4 mixture of rotamers;

Colorless sticky oil;

$[\alpha]_D^{18} = -188.0$  ( $c$  1.0,  $\text{CHCl}_3$ );

FTIR (neat) 3277, 2978, 2874, 1675, 1508, 1433, 1396, 1367, 1306, 1268, 1218, 1173, 1125, 1106  $\text{cm}^{-1}$ ;

$^1\text{H}$  NMR spectrum: see P23.

$^{13}\text{C}$  NMR (75 MHz,  $\text{CDCl}_3$ )  $\delta$  168.8, 164.6, 155.2, 154.4, 151.3, 147.7, 127.3, 126.7, 126.1, 120.7, 119.9, 81.1, 69.1, 67.3, 54.1, 51.6, 28.2, 27.5, 19.7, 19.1, 12.6;

HRMS (FAB) calcd for  $\text{C}_{17}\text{H}_{27}\text{N}_2\text{O}_5$   $m/z$  339.1920  $[\text{M}+\text{H}]^+$ , found 339.1917.



**(*S,E*)-*tert*-Butyl 2-((1-(allyloxy)-3-methyl-1-oxopent-2-en-2-yl)carbamoyl)-2,5-dihydro-1*H*-pyrrole-1-carboxylate (**20**)**

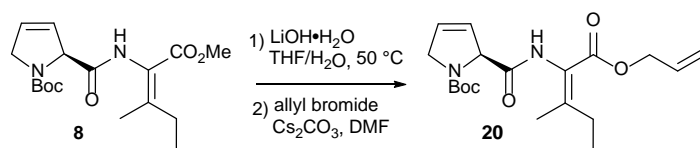

To a solution of **8** (169 mg, 499  $\mu\text{mol}$ ) in THF/H<sub>2</sub>O (1 : 1, 5.0 mL) was added LiOH·H<sub>2</sub>O (105 mg, 2.50 mmol). The mixture was stirred for 14 h at 50 °C, quenched with 1*N* HCl (10 mL). The pH of the solution was adjusted to acidity (pH 1–2). The aqueous layer was extracted with EtOAc (10 mL  $\times$  3). The combined organic layers were dried over anhydrous MgSO<sub>4</sub>, and filtered. The filtrate was concentrated under reduced pressure. The resulting carboxylic acid was subjected to the next esterification without further purification. To a solution of crude carboxylic acid in DMF (5.0 mL) were added Cs<sub>2</sub>CO<sub>3</sub> (163 mg, 501  $\mu\text{mol}$ ) and allyl bromide (51  $\mu\text{L}$ , 601  $\mu\text{mol}$ ) at 0 °C. The mixture was stirred for 3.5 h at room temperature, quenched with H<sub>2</sub>O (10 mL), and extracted with hexane/EtOAc (1 : 1, 10 mL  $\times$  3). The combined organic layers were washed with brine (30 mL), dried over anhydrous MgSO<sub>4</sub>, and filtered. The filtrate was concentrated under reduced pressure. The residue was purified by flash column chromatography on silica gel (hexane/EtOAc = 7 : 1 to 3 : 1) to give **20** (156 mg, 86% over 2 steps) as a 5 : 4 mixture of rotamers.

White solid;

mp 111–113 °C;

$[\alpha]_{\text{D}}^{21} = -2.7$  (*c* 1.15, CHCl<sub>3</sub>);

FTIR (neat) 3289, 2978, 2935, 2874, 1700, 1508, 1456, 1398, 1366, 1303, 1261, 1201, 1173, 1125, 1107 cm<sup>-1</sup>;

<sup>1</sup>H NMR spectrum: see P25.

<sup>13</sup>C NMR (75 MHz, CDCl<sub>3</sub>)  $\delta$  168.8, 163.8, 155.1, 154.4, 151.5, 148.1, 132.0, 127.3, 126.6, 126.1, 120.8, 119.9, 118.3, 117.9, 81.1, 69.0, 67.3, 65.3, 54.0, 28.2, 27.5, 19.8, 19.1, 12.6;

HRMS (FAB) calcd for C<sub>19</sub>H<sub>29</sub>N<sub>2</sub>O<sub>5</sub> *m/z* 365.2076 [M+H]<sup>+</sup>, found 365.2069.

**(*S,E*)-*tert*-Butyl 2-((1-(allyloxy)-3-methyl-1-oxopent-2-en-2-yl)(*tert*-butoxycarbonyl)carbamoyl)-2,5-dihydro-1*H*-pyrrole-1-carboxylate (**21**)**

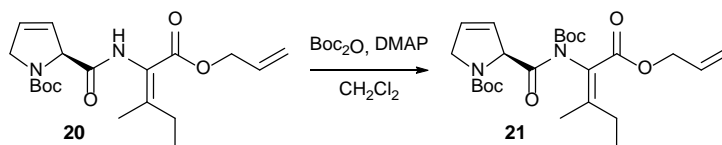

To a solution of **20** (156 mg, 428  $\mu\text{mol}$ ) in CH<sub>2</sub>Cl<sub>2</sub> (2.1 mL) were added Boc<sub>2</sub>O (200  $\mu\text{L}$ , 858  $\mu\text{mol}$ ) and DMAP (52.4 mg, 429  $\mu\text{mol}$ ) at 0 °C. The mixture was stirred for 3 h at room temperature and concentrated under reduced pressure. The residue was purified by flash column chromatography on silica gel (hexane/EtOAc = 20 : 1 to 10 : 1) to give **21** (201 mg, quant.) as a colorless sticky oil;

$[\alpha]_D^{21} = -1.7$  (*c* 1.09,  $\text{CHCl}_3$ );

FTIR (neat) 3419, 3087, 2978, 2935, 2871, 1722, 1701, 1648, 1458, 1402, 1368, 1294, 1257, 1225, 1203, 1154, 1129, 1107, 1058  $\text{cm}^{-1}$ ;

HRMS (FAB) calcd for  $\text{C}_{24}\text{H}_{37}\text{N}_2\text{O}_7$   $m/z$  465.2601  $[\text{M}+\text{H}]^+$ , found 465.2586.

NMR spectra: see P27~28.

**(2S)-tert-Butyl 2-((tert-butoxycarbonyl)((E)-1-((1-(diphenoxyphosphoryl)-2-methoxy-2-oxoethyl)amino)-3-methyl-1-oxopent-2-en-2-yl)carbamoyl)-2,5-dihydro-1H-pyrrole-1-carboxylate (9)**

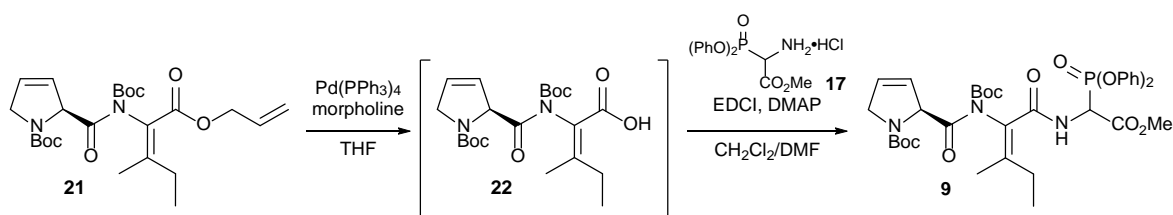

To a solution of **21** (162 mg, 349  $\mu\text{mol}$ ) in THF (3.5 mL) were added  $\text{Pd}(\text{PPh}_3)_4$  (40.3 mg, 34.9  $\mu\text{mol}$ ) and morpholine (300  $\mu\text{L}$ , 3.49 mmol) at 0  $^\circ\text{C}$ . The mixture was stirred for 2 h at room temperature, quenched with 1N HCl (10 mL), and extracted with EtOAc (10 mL  $\times$  3). The combined organic layers were dried over anhydrous  $\text{MgSO}_4$  and filtered. The filtrate was concentrated under reduced pressure to give carboxylic acid **22** which was subjected to the next reaction without further purification. The crude **22** in  $\text{CH}_2\text{Cl}_2$  (2.4 mL), EDCI (110 mg, 575  $\mu\text{mol}$ ), and DMAP (32.0 mg, 262  $\mu\text{mol}$ ) were subsequently added to a solution of  $\alpha$ -(diphenylphosphono)glycine ammonium salt **17** in DMF (1.2 mL) prepared from **3**<sup>1</sup> (238 mg, 523  $\mu\text{mol}$ ), 10% Pd/C (23.8 mg, 10 wt%), AcCl (280  $\mu\text{L}$ , 3.92 mmol), and MeOH (1.2 mL) in EtOAc (3.5 mL) at 0  $^\circ\text{C}$  under argon. The mixture was stirred for 15 h at room temperature, quenched with sat.  $\text{NH}_4\text{Cl}$  (5 mL), and extracted with EtOAc (5 mL  $\times$  3). The combined organic layers were washed with brine (15 mL), dried over anhydrous  $\text{MgSO}_4$ , and filtered. The filtrate was concentrated under reduced pressure. The residue was purified by flash column chromatography on silica gel (hexane/EtOAc = 10 : 1 to 1 : 1) to give **9** (143 mg, 56% over 2 steps) as a 1 : 1 mixture of diastereomers;

Colorless sticky oil.

FTIR (neat) 3320, 3009, 2979, 2934, 2871, 1739, 1681, 1591, 1489, 1405, 1369, 1288, 1256, 1209, 1181, 1153, 1059, 1026, 1009  $\text{cm}^{-1}$ ;

HRMS (FAB) calcd for  $\text{C}_{36}\text{H}_{47}\text{N}_3\text{O}_{11}\text{P}$   $m/z$  728.2948  $[\text{M}+\text{H}]^+$ , found 728.2944.

NMR spectra: see P29~30.

**4-Ethyl 1-methyl 2-((E)-2-((S)-N,1-bis(tert-butoxycarbonyl)-2,5-dihydro-1H-pyrrole-2-carboxamido)-3-methylpent-2-enamido)but-2-enedioate (23)**

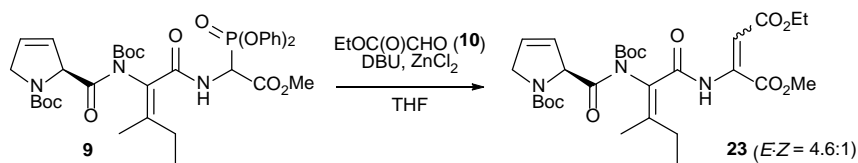

To a solution of **9** (140 mg, 192  $\mu\text{mol}$ ) and  $\text{ZnCl}_2$  (384  $\mu\text{L}$ , 384  $\mu\text{mol}$ , 1.0 M solution in  $\text{Et}_2\text{O}$ ) in THF (1.9 mL) was added DBU (29  $\mu\text{L}$ , 192  $\mu\text{mol}$ ) at 0  $^\circ\text{C}$  under argon. The mixture was stirred for 30 min at 0  $^\circ\text{C}$ . Ethyl glyoxalate polymer form (**10**) (41  $\mu\text{L}$ , 192  $\mu\text{mol}$ , 47% solution in toluene) was added to the mixture. The mixture was stirred for 15 h at room temperature, quenched with sat.  $\text{NH}_4\text{Cl}$  (5 mL), and extracted with EtOAc (5 mL  $\times$  3). The combined organic layers were washed with brine (15 mL), dried over anhydrous  $\text{MgSO}_4$ , and filtered. The filtrate was concentrated under reduced pressure. The residue was purified by flash column chromatography on silica gel (hexane/EtOAc = 9 : 1 to 5 : 1) to give **23** (88.5 mg, 80%, *E* : *Z* = 4.6 : 1) as a mixture of *E*-**23** and *Z*-**23**.

Colorless amorphous solid;

FTIR (neat) 3294, 3018, 2980, 2936, 2873, 1739, 1716, 1671, 1623, 1520, 1420, 1370, 1288, 1258, 1218, 1143, 1098, 1063, 1038  $\text{cm}^{-1}$ ;

HRMS (CI) calcd for  $\text{C}_{28}\text{H}_{42}\text{N}_3\text{O}_{10}$   $m/z$  580.2870  $[\text{M}+\text{H}]^+$ , found 580.2878.

NMR spectra: see P31~32.

### Synthesis of the tripeptide side chain **24**

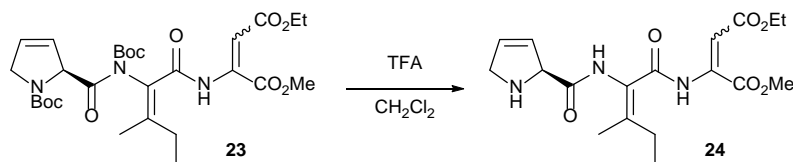

To a solution of **23** (10.1 mg, 17.4  $\mu\text{mol}$ ) was added TFA (0.5 mL) in  $\text{CH}_2\text{Cl}_2$  (0.5 mL) at 0  $^\circ\text{C}$  under argon. The mixture was stirred for 30 min at room temperature and concentrated under reduce pressure to give a crude 4.3:1 mixture of *E*-**24** and *Z*-**24**. The residue was purified by PLC (silica gel 60 F-254, 0.5 mm thickness, manufactured by Merck) ( $\text{CHCl}_3/\text{MeOH}$  = 10 : 1) to give *E*-**24** (2.3 mg, 35%) and a 1 : 1.6 mixture of *E*-**24** and *Z*-**24** (1.2 mg, 18%). The stereochemistry was determined by comparison of the chemical shift values of olefinic proton (*E*: 6.05 ppm, *Z*: 5.46 ppm).<sup>2</sup>;

***E*-24:**

$^1\text{H}$  NMR (300 MHz,  $\text{CD}_3\text{OD}$ )  $\delta$  6.05 (s, 1 H), 6.00 (m, 1 H), 5.87 (m, 1 H), 4.59 (m, 1 H), 4.13 (q,  $J$  = 7.2 Hz, 2 H), 3.88 (m, 2 H), 3.81 (s, 3 H), 2.36 (q,  $J$  = 7.5 Hz, 2 H), 1.77 (s, 3 H), 1.25 (t,  $J$  = 7.2 Hz, 3 H), 1.09 (t,  $J$  = 7.5 Hz, 3 H).

***Z*-24:**

$^1\text{H}$  NMR (300 MHz,  $\text{CD}_3\text{OD}$ )  $\delta$  6.00 (m, 1 H), 5.93 (m, 1 H), 5.46 (s, 1 H), 4.58 (m, 1 H), 4.22 (q,  $J$  = 7.2 Hz,

2 H), 3.90 (m, 2 H), 3.83 (s, 3 H), 2.56 (q,  $J = 7.5$  Hz, 2 H), 1.80 (s, 3 H), 1.28 (t,  $J = 7.2$  Hz, 3 H), 1.11 (t,  $J = 7.5$  Hz, 3 H).

## References

- 1) Hamada, M.; Shinada, T.; Ohfune, Y. *Org. Lett.* **2009**, *11*, 4664–4667.
- 2) Yasuno, Y.; Hamada, M.; Yamada, T.; Shinada, T.; Ohune, Y. *Eur. J. Org. Chem.* **2013**, 1884–1888.
- 3) Mazurkiewicz, R.; Kuźnic, A. *Tetrahedron Lett.* **2006**, *47*, 3439–3442.
- 4) Schmidt, U.; Griesser, H.; Leitenberger, V.; Lieberknecht, A. Mangold, R.; Meyer, R.; Riedl, B. *Synthesis*, **1992**, 487–490.
- 5) (a) Shangguan, N.; Joullié, M. *Tetrahedron. Lett.* **2009**, *50*, 6748–6750. (b) Schumacher, K. K.; Jiang, J.; Joullié, M. M. *Tetrahedron: Asymmetry* **1998**, *9*, 47–53.

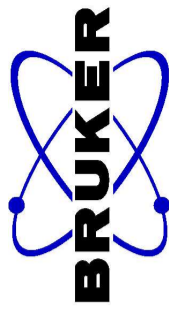

Current Data Parameters  
 NAME md5  
 EXPNO 354  
 PROCNO 1

F2 - Acquisition Parameters  
 Date\_ 20130721  
 Time 8.47  
 INSTRUM spect  
 PROBHD 5 mm BBI 1H-BB  
 PULPROG noesytp  
 TD 2048  
 SOLVENT CDCl3  
 NS 24  
 DS 48  
 SWH 5630.631 Hz  
 FIDRES 2.749331 Hz  
 AQ 0.1820012 sec  
 RG 256  
 DW 88.800 usec  
 DE 6.00 usec  
 TE 298.0 K  
 d0 0.00000300 sec  
 d1 1.50000000 sec  
 d8 0.80000001 sec  
 IN0 0.00008880 sec

==== CHANNEL f1 =====  
 NUC1 1H  
 P1 10.20 usec  
 PL1 3.50 dB  
 SFO1 600.1322205 MHz

F1 - Acquisition parameters  
 ND0 2  
 TD 512  
 SFO1 600.1322 MHz  
 FIDRES 10.997326 Hz  
 SW 9.382 ppm  
 ENMODE undefined

F2 - Processing parameters  
 SI 1024  
 SF 600.1300044 MHz  
 WDW QSINE  
 SSB 2  
 LB 0.00 Hz  
 GB 0  
 PC 1.00

F1 - Processing parameters  
 SI 512  
 MC2 TPPI  
 SF 600.1300045 MHz  
 WDW QSINE  
 SSB 2  
 LB 0.00 Hz  
 GB 0

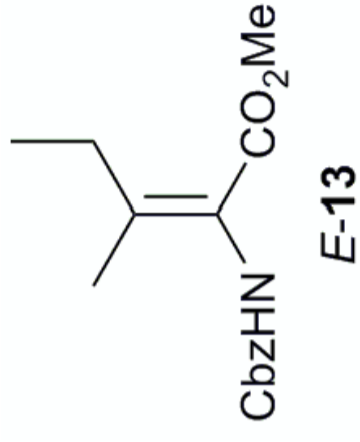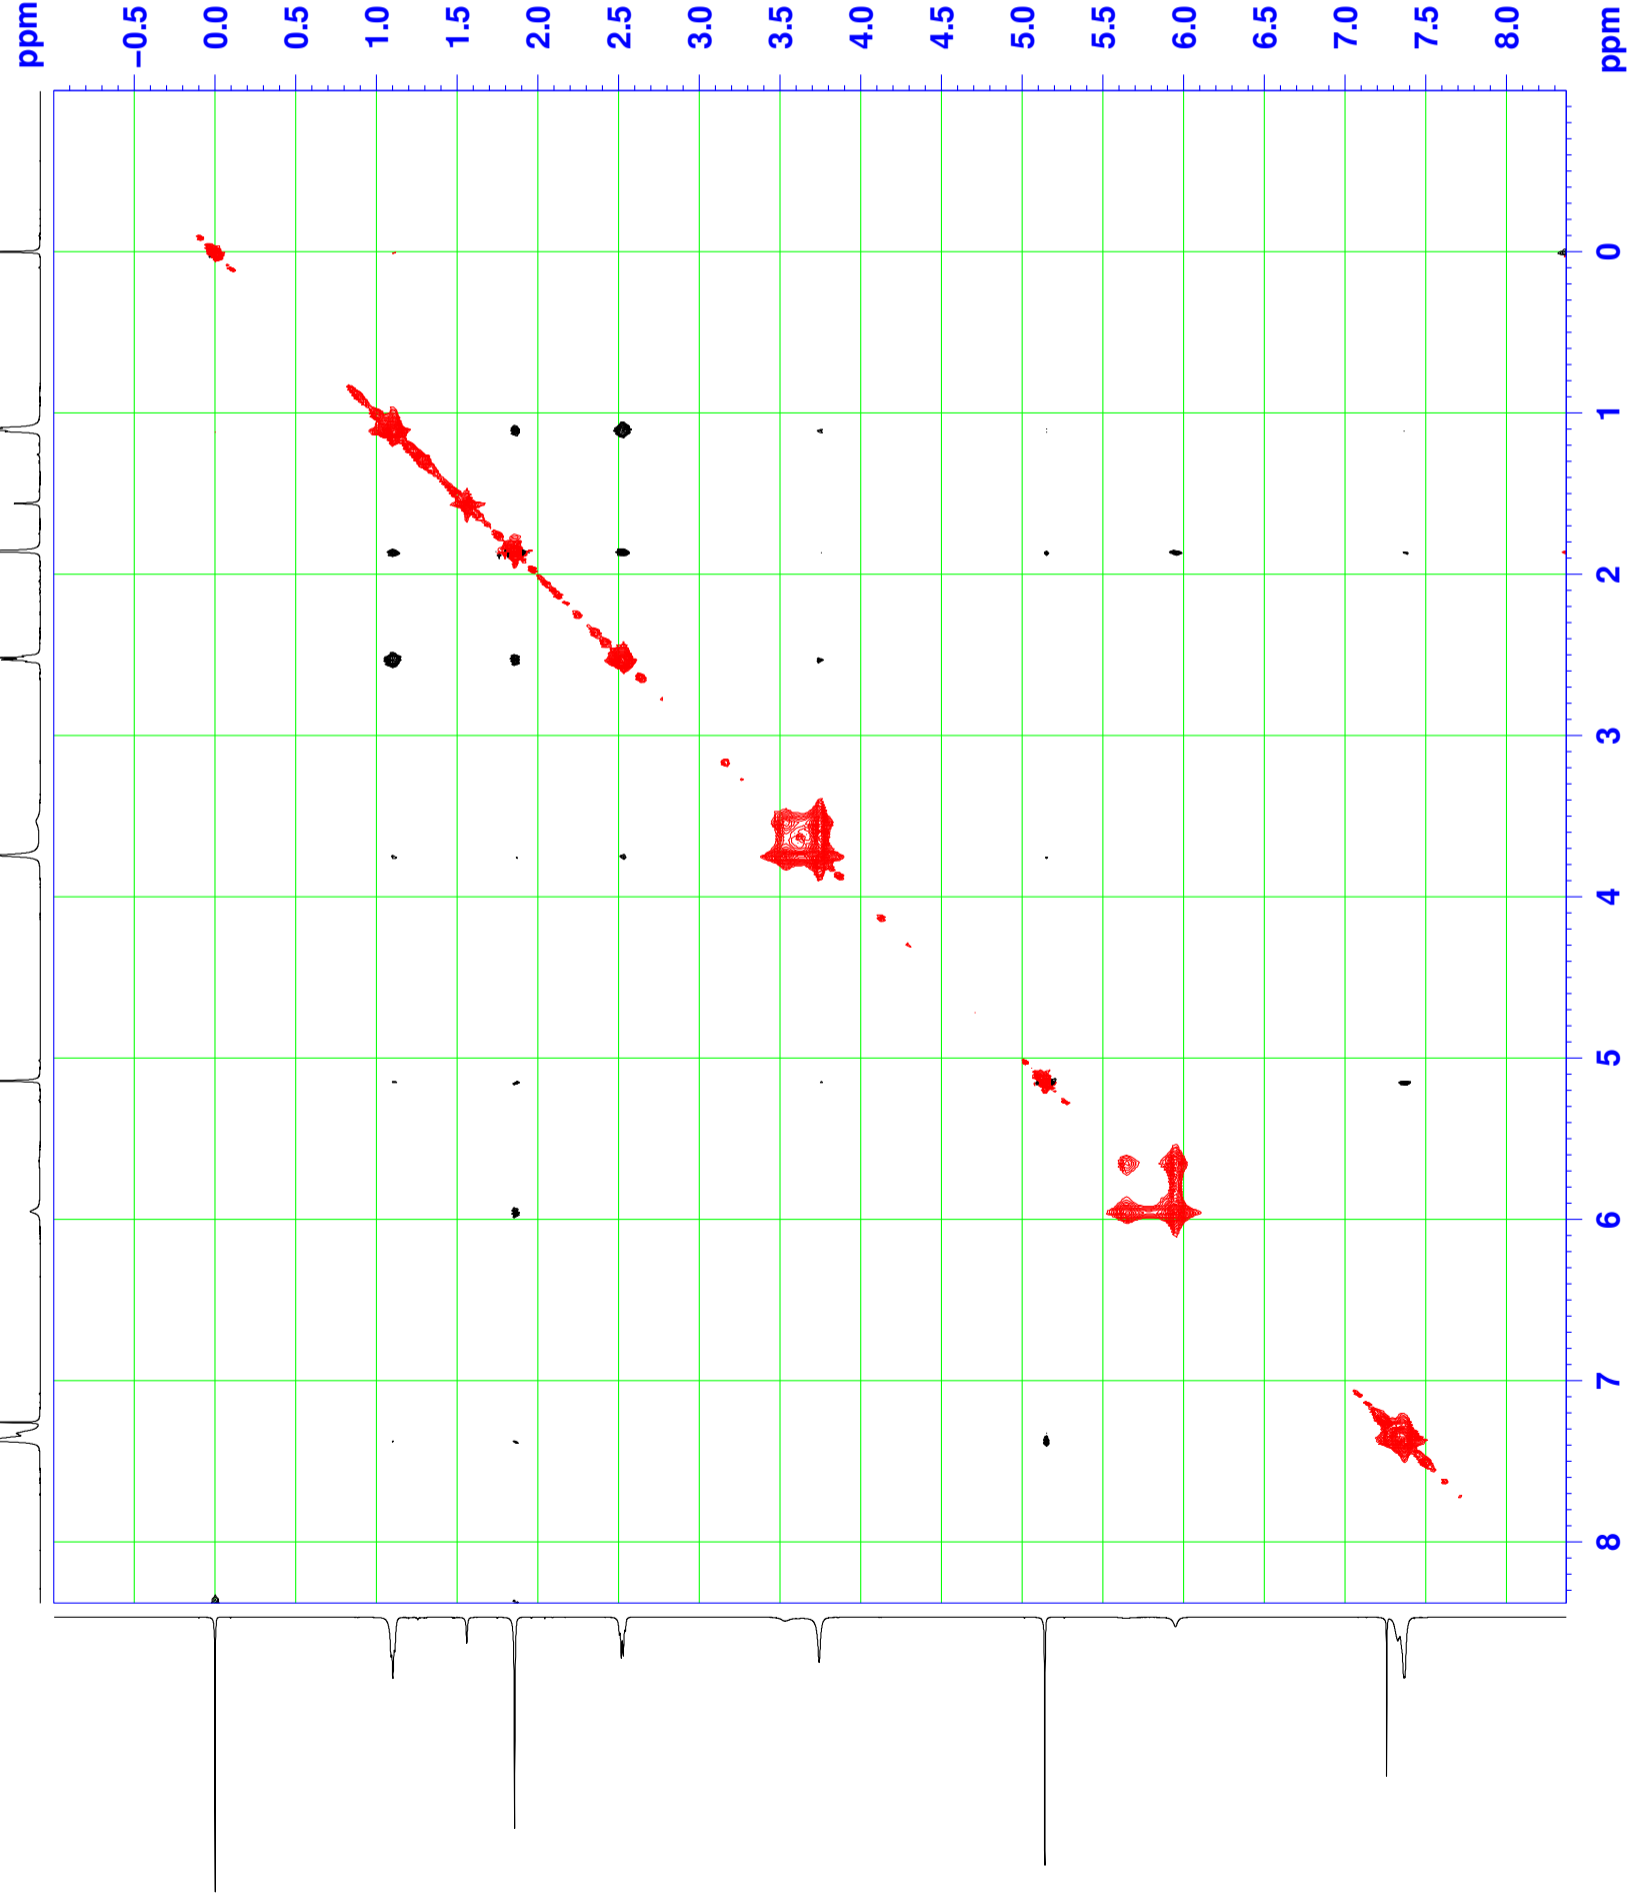



Current Data Parameters  
 NAME md5  
 EXPNO 357  
 PROCNO 1

F2 - Acquisition Parameters  
 Date\_ 20130722  
 Time 13.56  
 INSTRUM spect  
 PROBHD 5 mm BBI 1H-BB  
 PULPROG noesytp  
 TD 2048  
 SOLVENT CDCl3  
 NS 24  
 DS 48  
 SWH 5630.631 Hz  
 FIDRES 2.749331 Hz  
 AQ 0.1820012 sec  
 RG 256  
 DW 88.800 usec  
 DE 6.00 usec  
 TE 298.0 K  
 d0 0.00000300 sec  
 D1 1.50000000 sec  
 D8 0.80000001 sec  
 IN0 0.00008880 sec

==== CHANNEL f1 =====  
 NUC1 1H  
 P1 10.20 usec  
 PL1 3.50 dB  
 SFO1 600.1322205 MHz

F1 - Acquisition parameters  
 ND0 2  
 TD 512  
 SFO1 600.1322 MHz  
 FIDRES 10.997326 Hz  
 SW 9.382 ppm  
 ENMODE undefined

F2 - Processing parameters  
 SI 1024  
 SF 600.1300073 MHz  
 WDW QSI  
 SSB 2  
 LB 0.00 Hz  
 GB 0  
 PC 1.00

F1 - Processing parameters  
 SI 512  
 MC2 TPPI  
 SF 600.1300125 MHz  
 WDW QSI  
 SSB 2  
 LB 0.00 Hz  
 GB 0

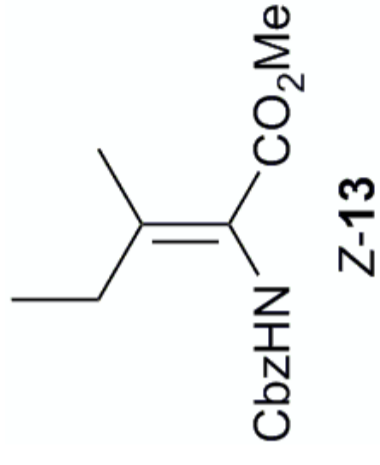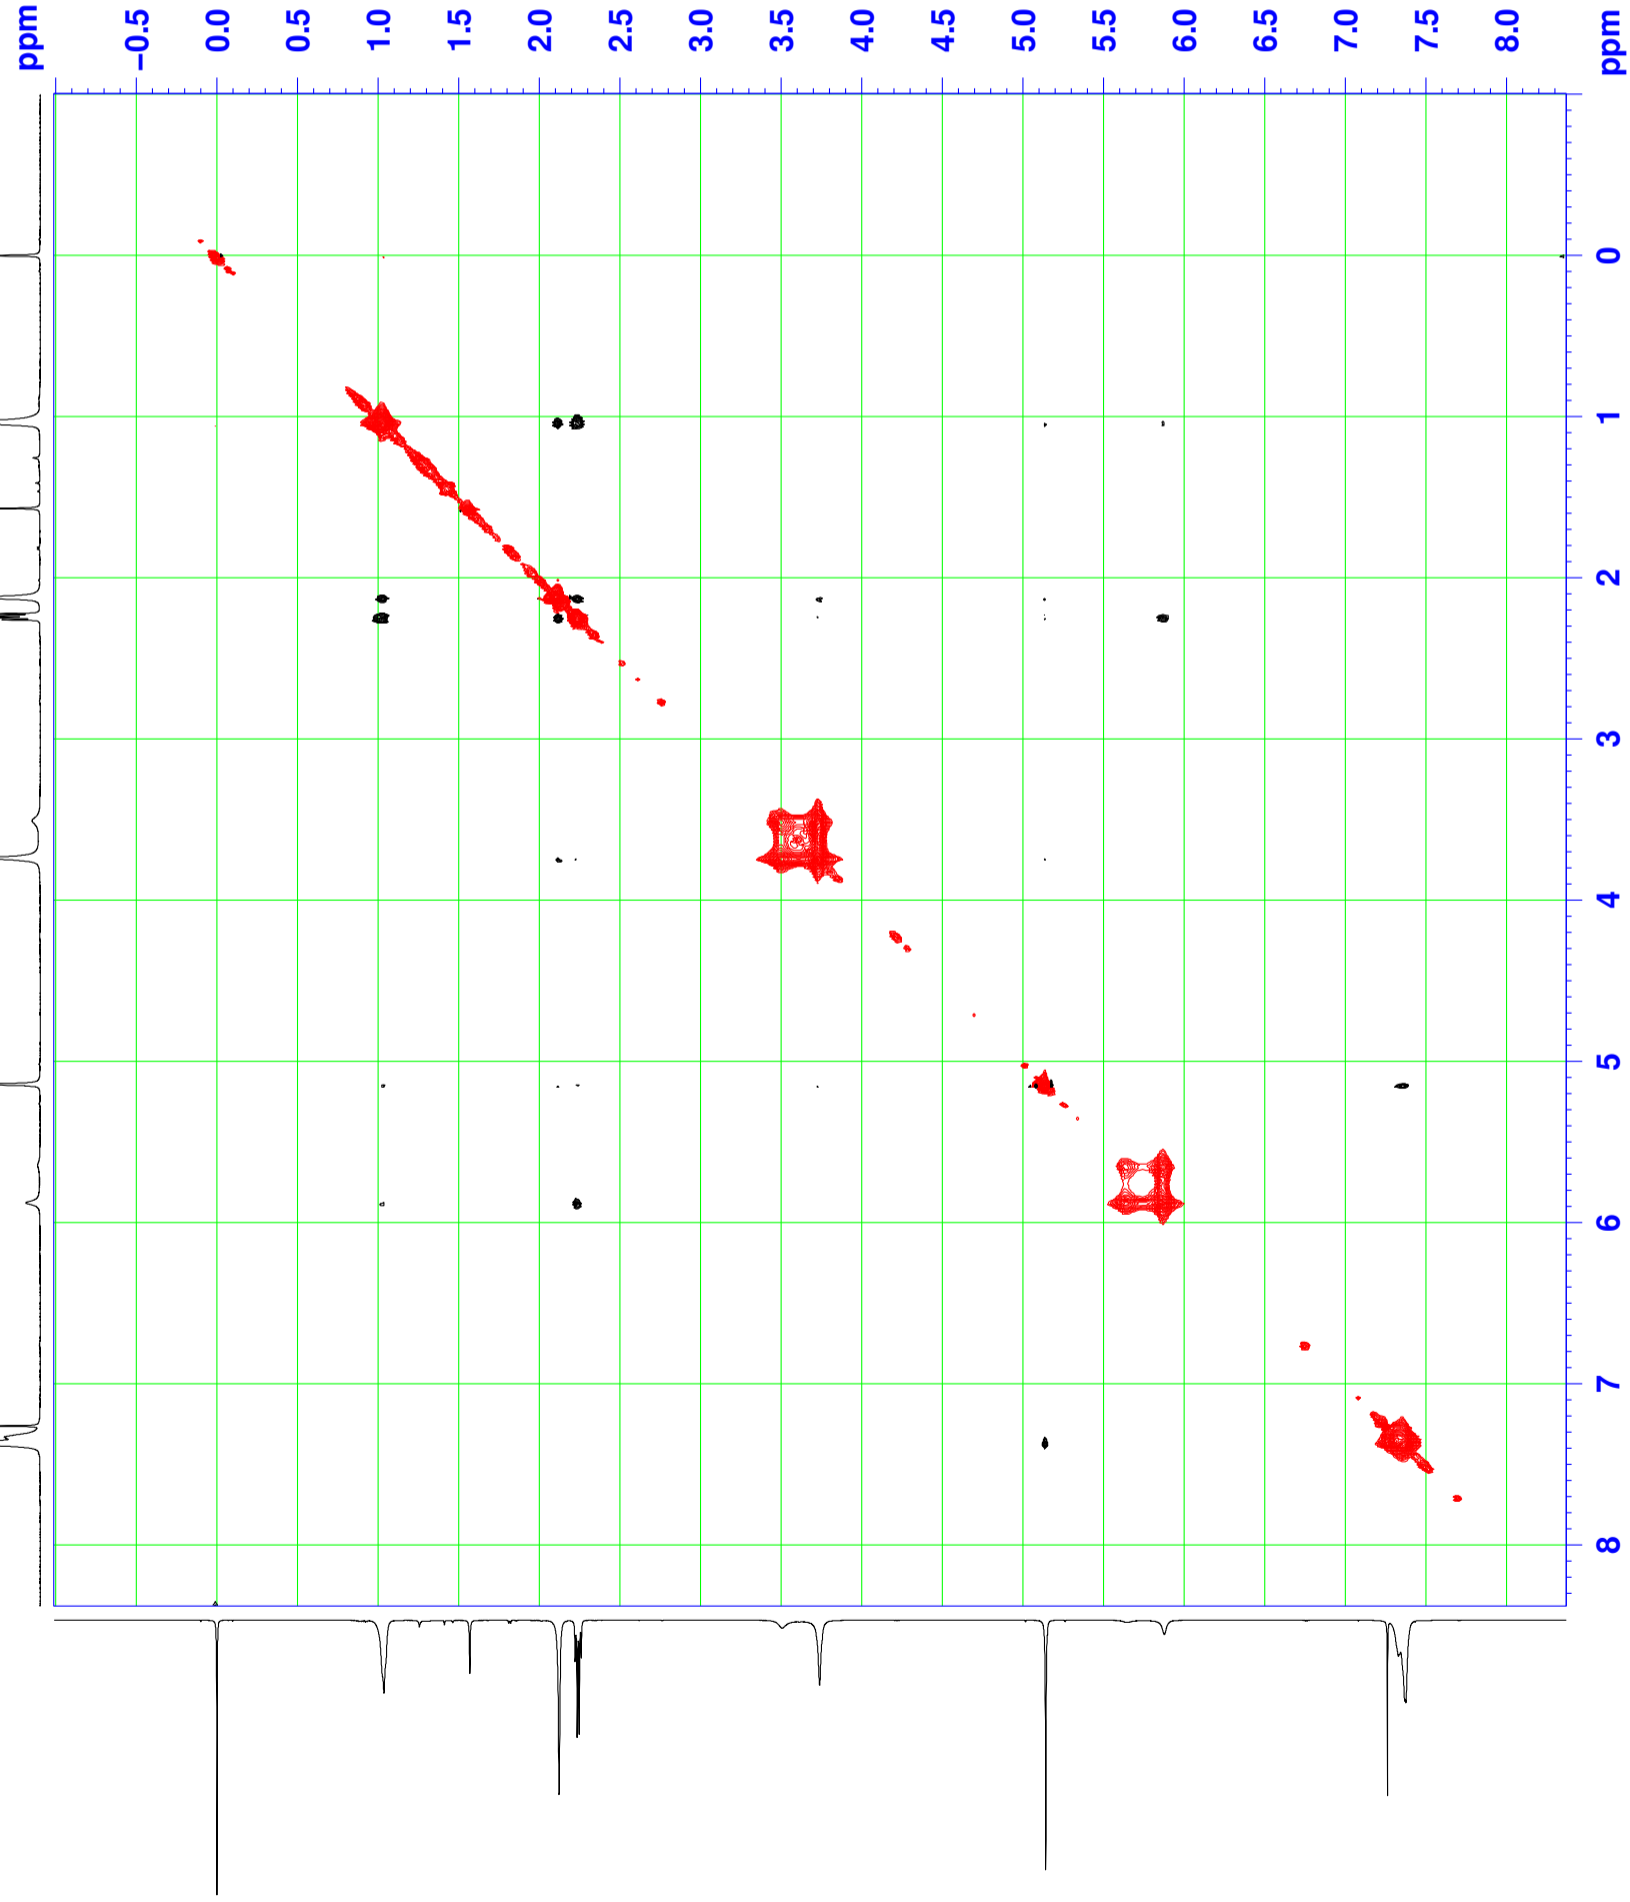

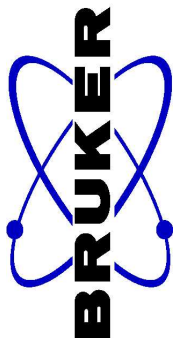

Current Data Parameters  
 NAME Pro-HWE  
 EXPNO 10  
 PROCNO 1

F2 - Acquisition Parameters  
 Date\_ 20140101  
 Time\_ 16.15  
 INSTRUM av300  
 PROBHD 5 mm PABBO BB-  
 PULPROG zg30  
 TD 65536  
 SOLVENT CDCl3  
 NS 16  
 DS 2  
 SWH 6188.119 Hz  
 FIDRES 0.094423 Hz  
 AQ 5.2953587 sec  
 RG 64  
 DW 80.800 usec  
 DE 6.50 usec  
 TE 291.8 K  
 D1 1.00000000 sec

==== CHANNEL f1 =====  
 NUC1 1H  
 P1 15.00 usec  
 PLW1 7.5000000 W  
 SFO1 300.1318534 MHz

F2 - Processing parameters  
 SI 32768  
 SF 300.1300064 MHz  
 WDW EM  
 SSB 0  
 LB 0.30 Hz  
 GB 0  
 PC 1.00

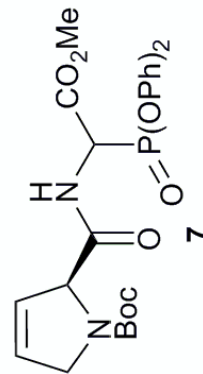

7.936  
7.730  
7.308  
7.295  
7.284  
7.269  
7.229  
7.193  
7.169  
7.144  
6.982  
5.931  
5.856  
5.849  
5.835  
5.828  
5.723  
5.610  
5.579  
5.569  
5.538  
5.503  
5.494  
5.463  
5.079  
5.020  
4.322  
4.305  
4.255  
4.229  
4.140  
4.126  
4.117  
4.093  
4.069  
4.058  
3.774  
3.746

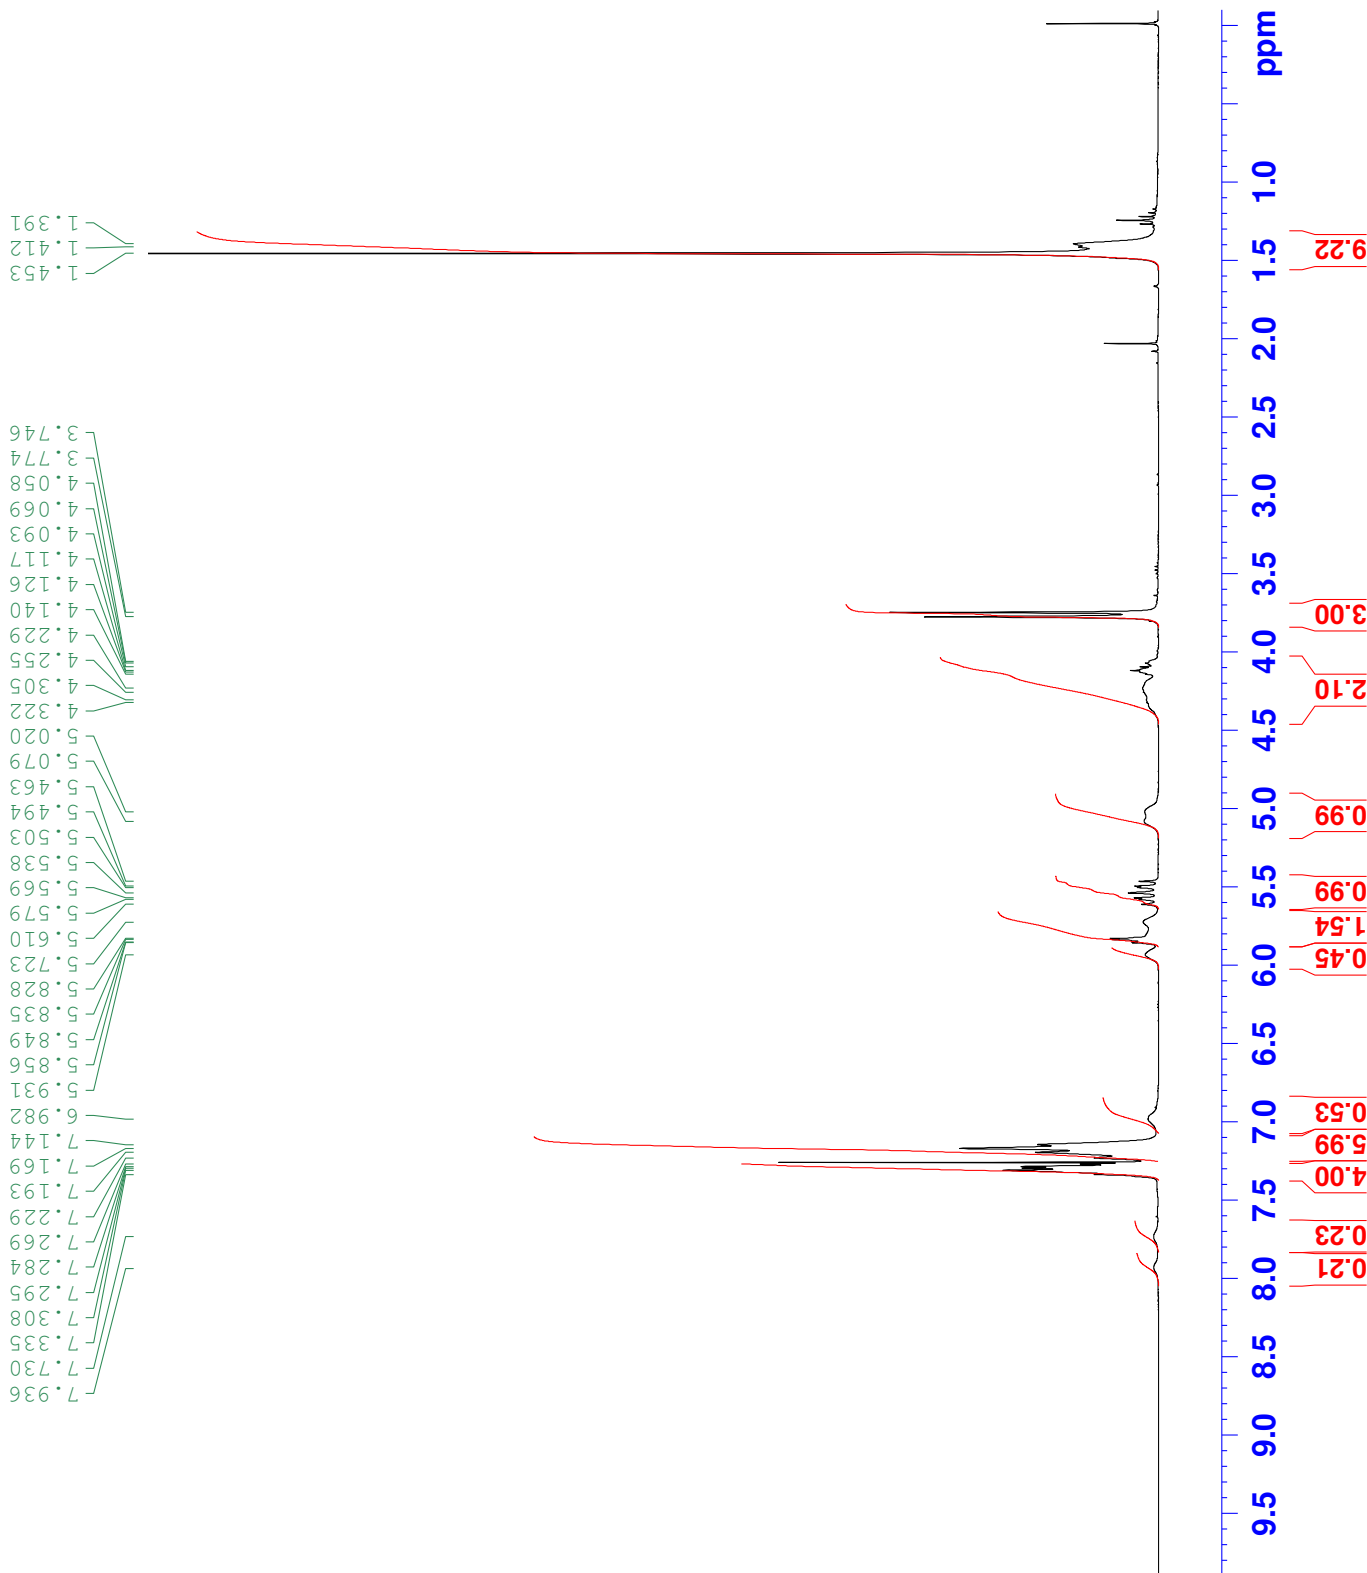

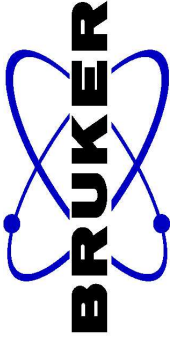

Current Data Parameters  
 NAME Pro-HWE  
 EXPNO 20  
 PROCNO 1

F2 - Acquisition Parameters  
 Date\_ 20140101  
 Time 17.54  
 INSTRUM av300  
 PROBHD 5 mm PABBO BB-  
 PULPROG zgpg30  
 TD 65536  
 SOLVENT CDC13  
 NS 1024  
 DS 2  
 SWH 18028.846 Hz  
 FIDRES 0.275098 Hz  
 AQ 1.8175818 sec  
 RG 203  
 DW 27.733 usec  
 DE 6.50 usec  
 TE 292.8 K  
 D1 2.0000000 sec  
 D11 0.0300000 sec

==== CHANNEL f1 =====  
 NUC1 13C  
 P1 10.00 usec  
 PLW1 38.05099869 W  
 SFO1 75.4752953 MHz

==== CHANNEL f2 =====  
 CPDPRG2 waltz16  
 NUC2 1H  
 PCPD2 90.00 usec  
 PLW2 7.5000000 W  
 PLW12 0.20833001 W  
 PLW13 0.16875000 W  
 SFO2 300.1312005 MHz

F2 - Processing parameters  
 SI 32768  
 SF 75.4677691 MHz  
 WDW EM  
 SSB 0  
 LB 1.00 Hz  
 GB 0  
 PC 1.40

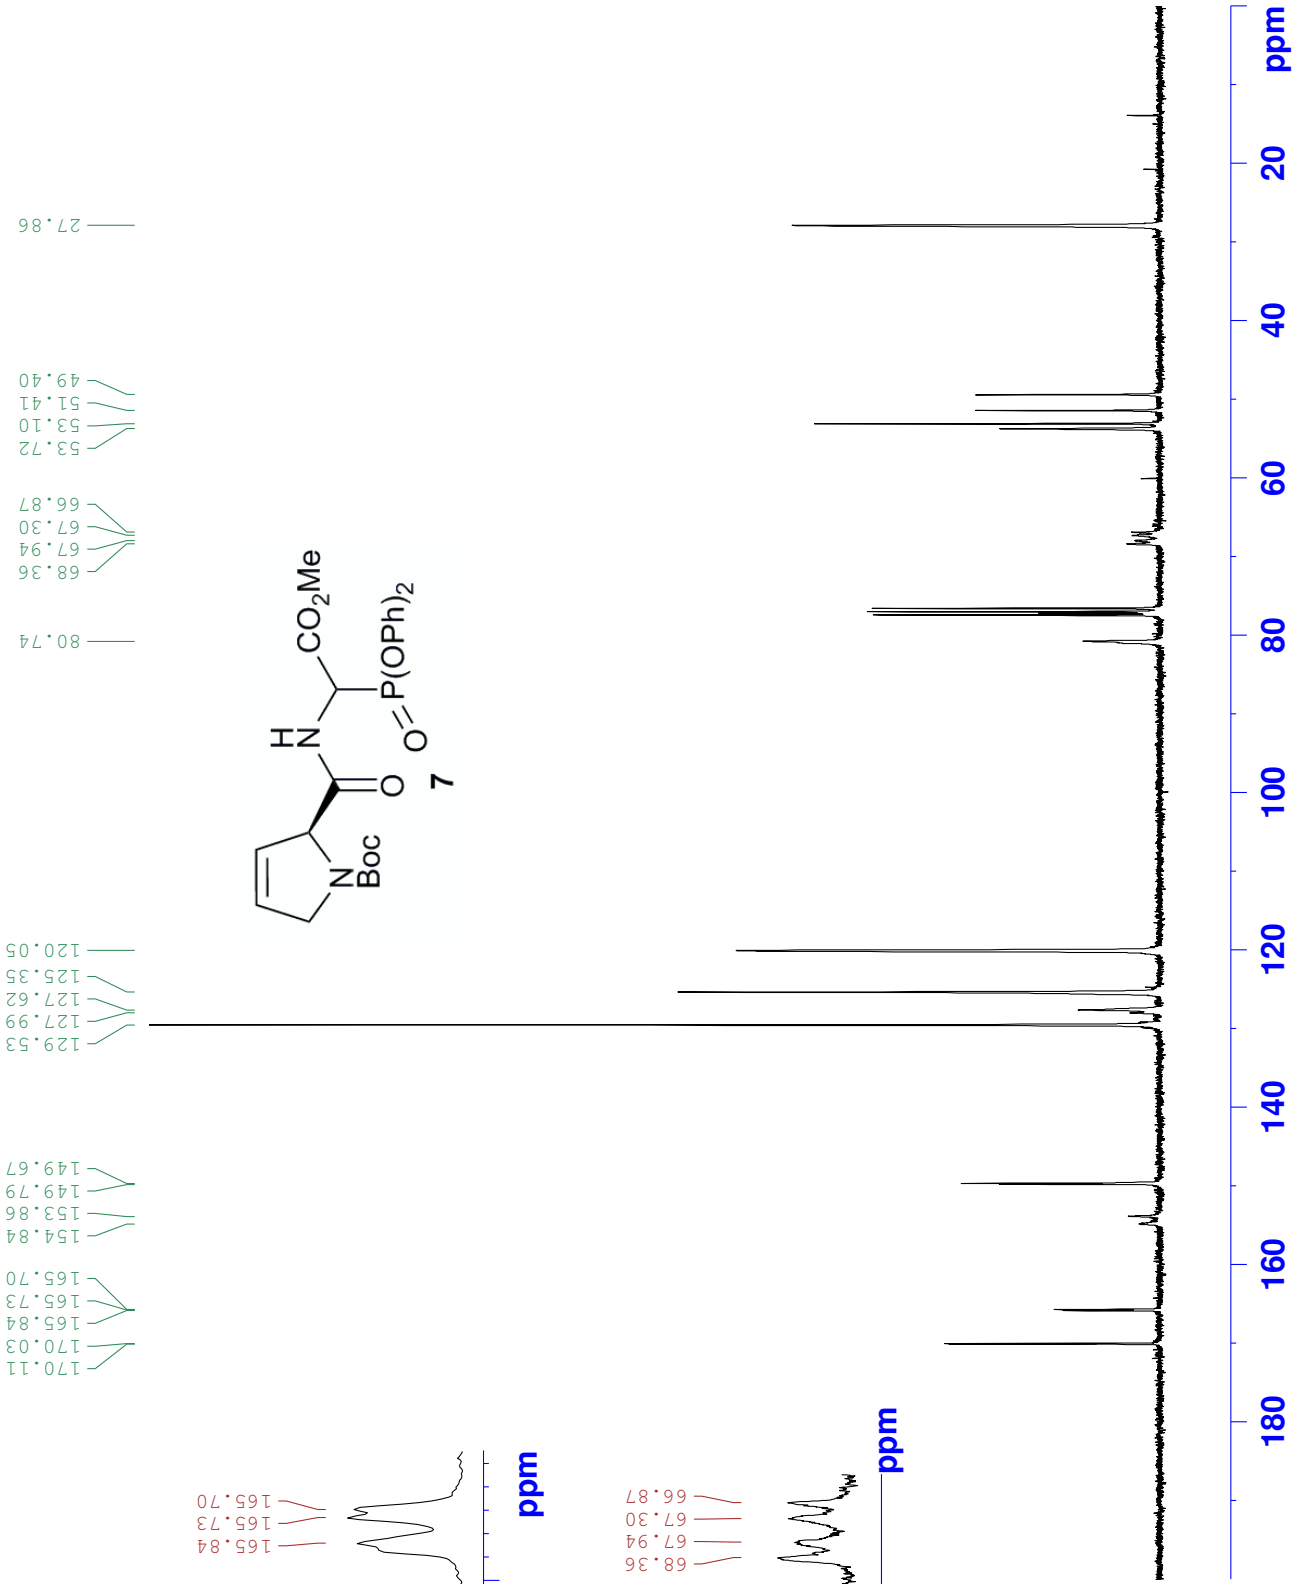



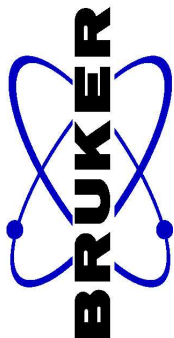

Current Data Parameters  
 NAME phomo-E-olefine  
 EXPNO 10  
 PROCNO 1

F2 - Acquisition Parameters  
 Date\_ 20131113  
 Time 22.07  
 INSTRUM av300  
 PROBHD 5 mm PABBO BB-  
 PULPROG zg30  
 TD 65536  
 SOLVENT CDCl3  
 NS 16  
 DS 2  
 SWH 6188.119 Hz  
 FIDRES 0.094423 Hz  
 AQ 5.2953587 sec  
 RG 80.6  
 DW 80.800 usec  
 DE 6.50 usec  
 TE 292.4 K  
 D1 1.00000000 sec

==== CHANNEL f1 =====  
 NUC1 1H  
 P1 15.00 usec  
 PLW1 7.5000000 W  
 SFO1 300.1318534 MHz

F2 - Processing parameters  
 SI 32768  
 SF 300.1300063 MHz  
 WDW EM  
 SSB 0  
 LB 0.30 Hz  
 GB 0  
 PC 1.00

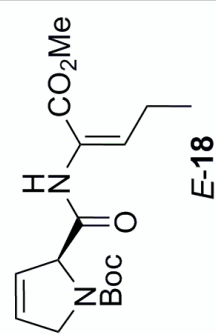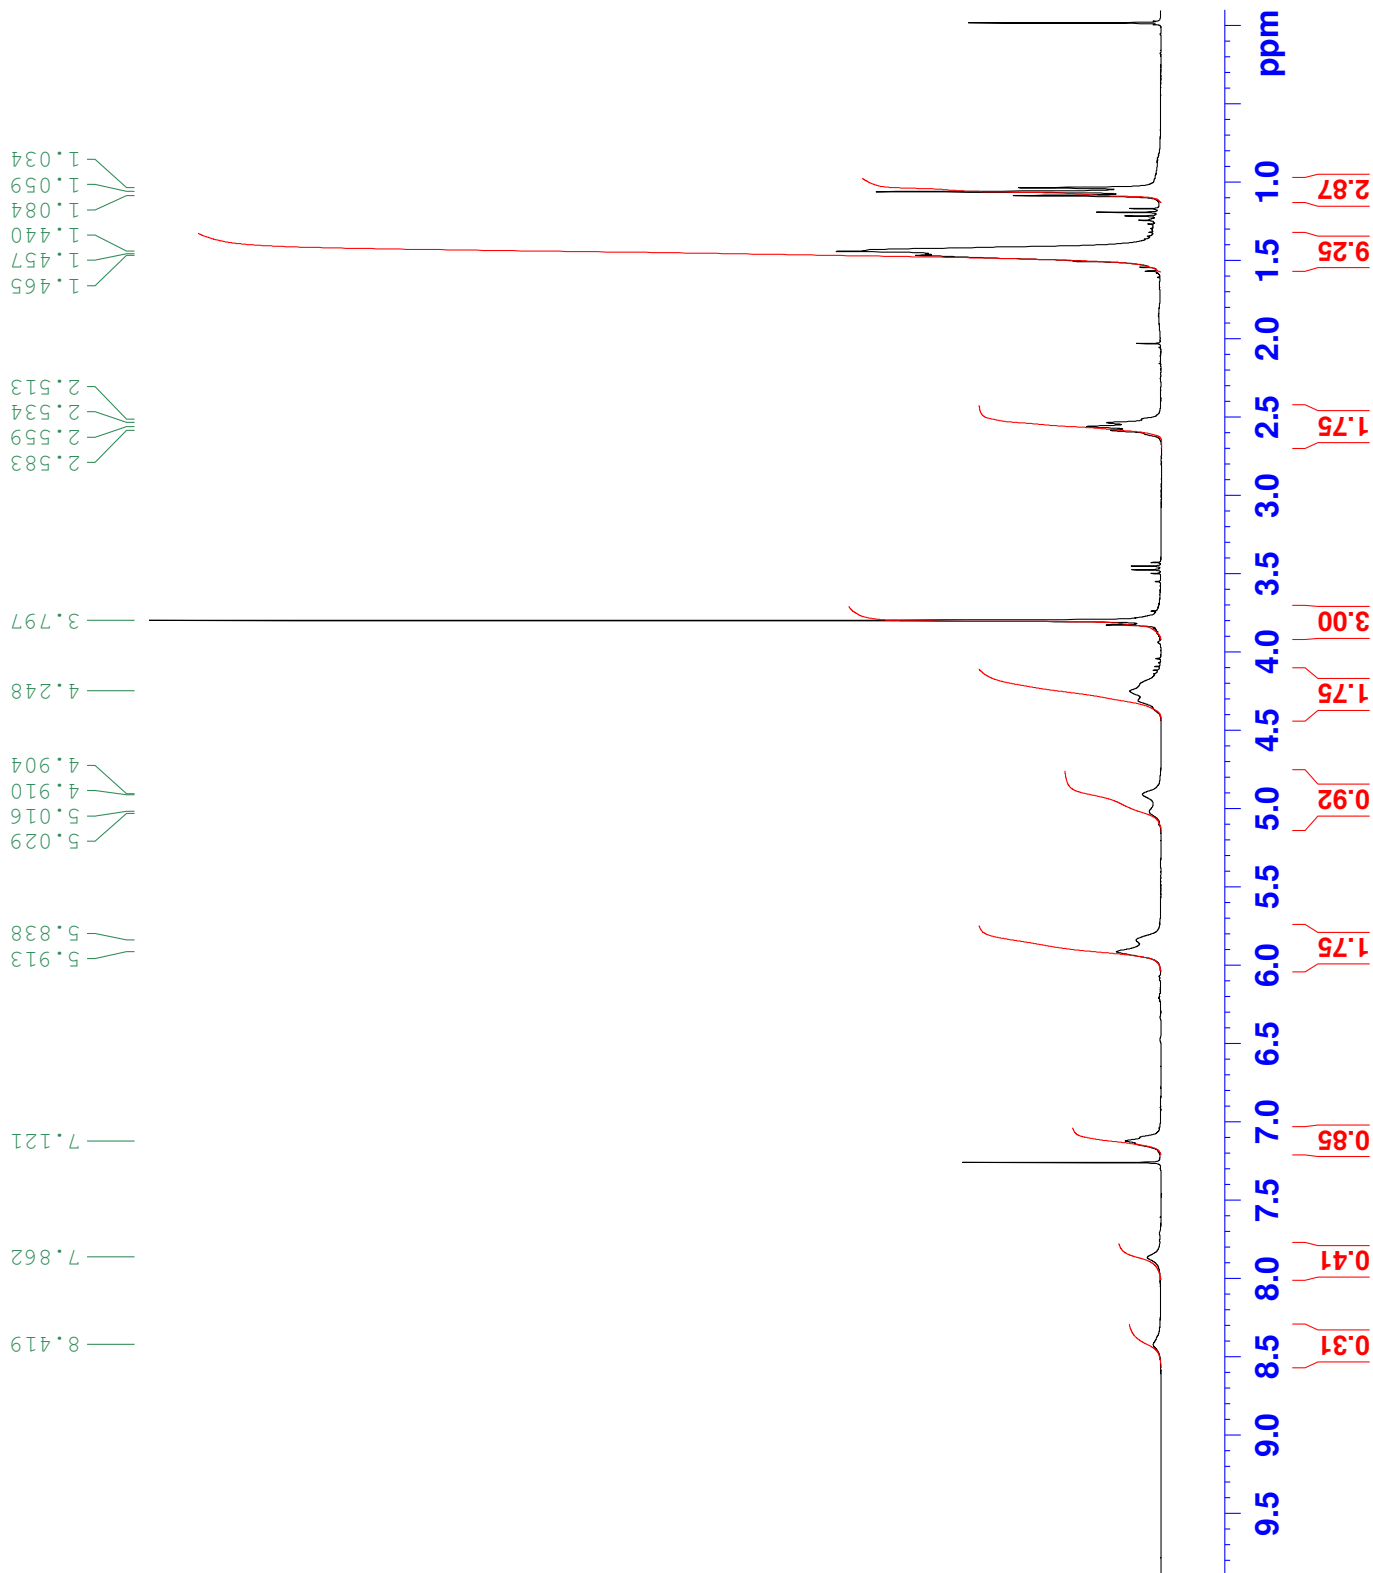



Current Data Parameters  
 NAME phomo-E-olefine  
 EXPNO 20  
 PROCNO 1

F2 - Acquisition Parameters  
 Date\_ 20131113  
 Time 23.02  
 INSTRUM av300  
 PROBHD 5 mm PABBO BB-  
 PULPROG zgpg30  
 TD 65536  
 SOLVENT CDC13  
 NS 800  
 DS 2  
 SWH 18028.846 Hz  
 FIDRES 0.275098 Hz  
 AQ 1.8175818 sec  
 RG 203  
 DW 27.733 usec  
 DE 6.50 usec  
 TE 293.1 K  
 D1 2.00000000 sec  
 D11 0.03000000 sec

==== CHANNEL f1 =====  
 NUC1 13C  
 P1 10.00 usec  
 PLW1 38.05099869 W  
 SFO1 75.4752953 MHz

==== CHANNEL f2 =====  
 CPDPRG2 waltz16  
 NUC2 1H  
 PCPD2 90.00 usec  
 PLW2 7.50000000 W  
 PLW12 0.20833001 W  
 PLW13 0.16875000 W  
 SFO2 300.1312005 MHz

F2 - Processing parameters  
 SI 32768  
 SF 75.4677621 MHz  
 WDW EM  
 SSB 0  
 LB 1.00 Hz  
 GB 0  
 PC 1.40

168.65  
 164.20  
 154.68  
 153.81  
 134.73  
 127.57  
 126.10  
 123.72  
 80.67  
 69.38  
 68.38  
 65.54  
 53.68  
 52.00  
 27.99  
 21.54  
 14.98  
 13.83

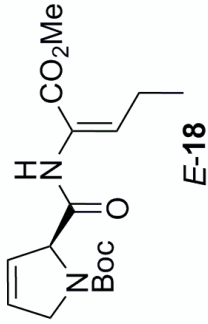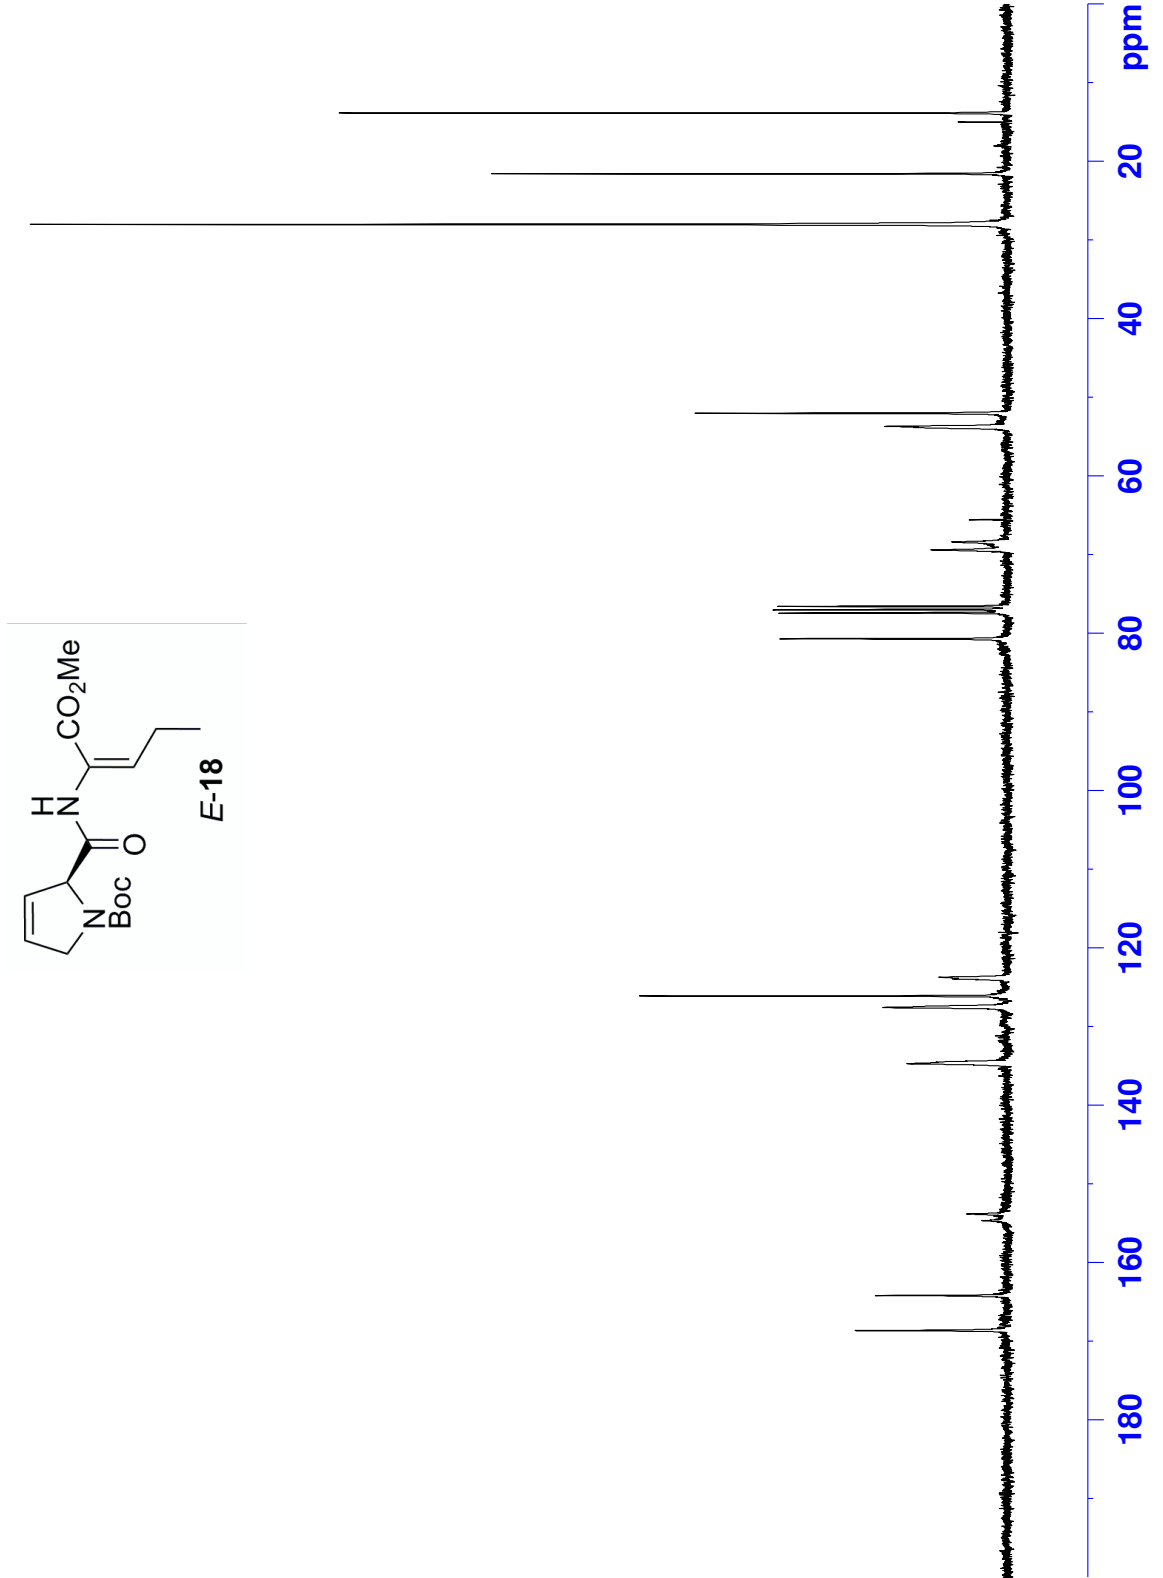

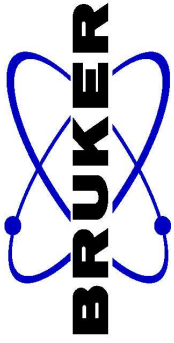

Current Data Parameters  
 NAME phomo-Z-olefin  
 EXPNO 20  
 PROCNO 1

F2 - Acquisition Parameters  
 Date\_ 20140105  
 Time\_ 12.37  
 INSTRUM av300  
 PROBHD 5 mm PABBO BB-  
 PULPROG zg30  
 TD 65536  
 SOLVENT CDCl3  
 NS 16  
 DS 2  
 SWH 6188.119 Hz  
 FIDRES 0.094423 Hz  
 AQ 5.2953587 sec  
 RG 64  
 DW 80.800 usec  
 DE 6.50 usec  
 TE 290.5 K  
 D1 1.00000000 sec

==== CHANNEL f1 =====  
 NUC1 1H  
 P1 15.00 usec  
 PLW1 7.5000000 W  
 SFO1 300.1318534 MHz

F2 - Processing parameters  
 SI 32768  
 SF 300.1300061 MHz  
 WDW EM  
 SSB 0  
 LB 0.30 Hz  
 GB 0  
 PC 1.00

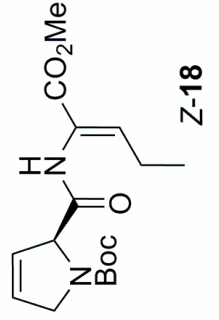

8.031  
 7.319  
 6.675  
 6.654  
 5.946  
 5.845  
 5.083  
 4.981  
 4.400  
 4.349  
 4.258  
 4.233  
 3.731  
 2.189  
 2.163  
 2.137  
 2.112  
 2.087  
 1.463  
 1.063  
 1.039  
 1.014

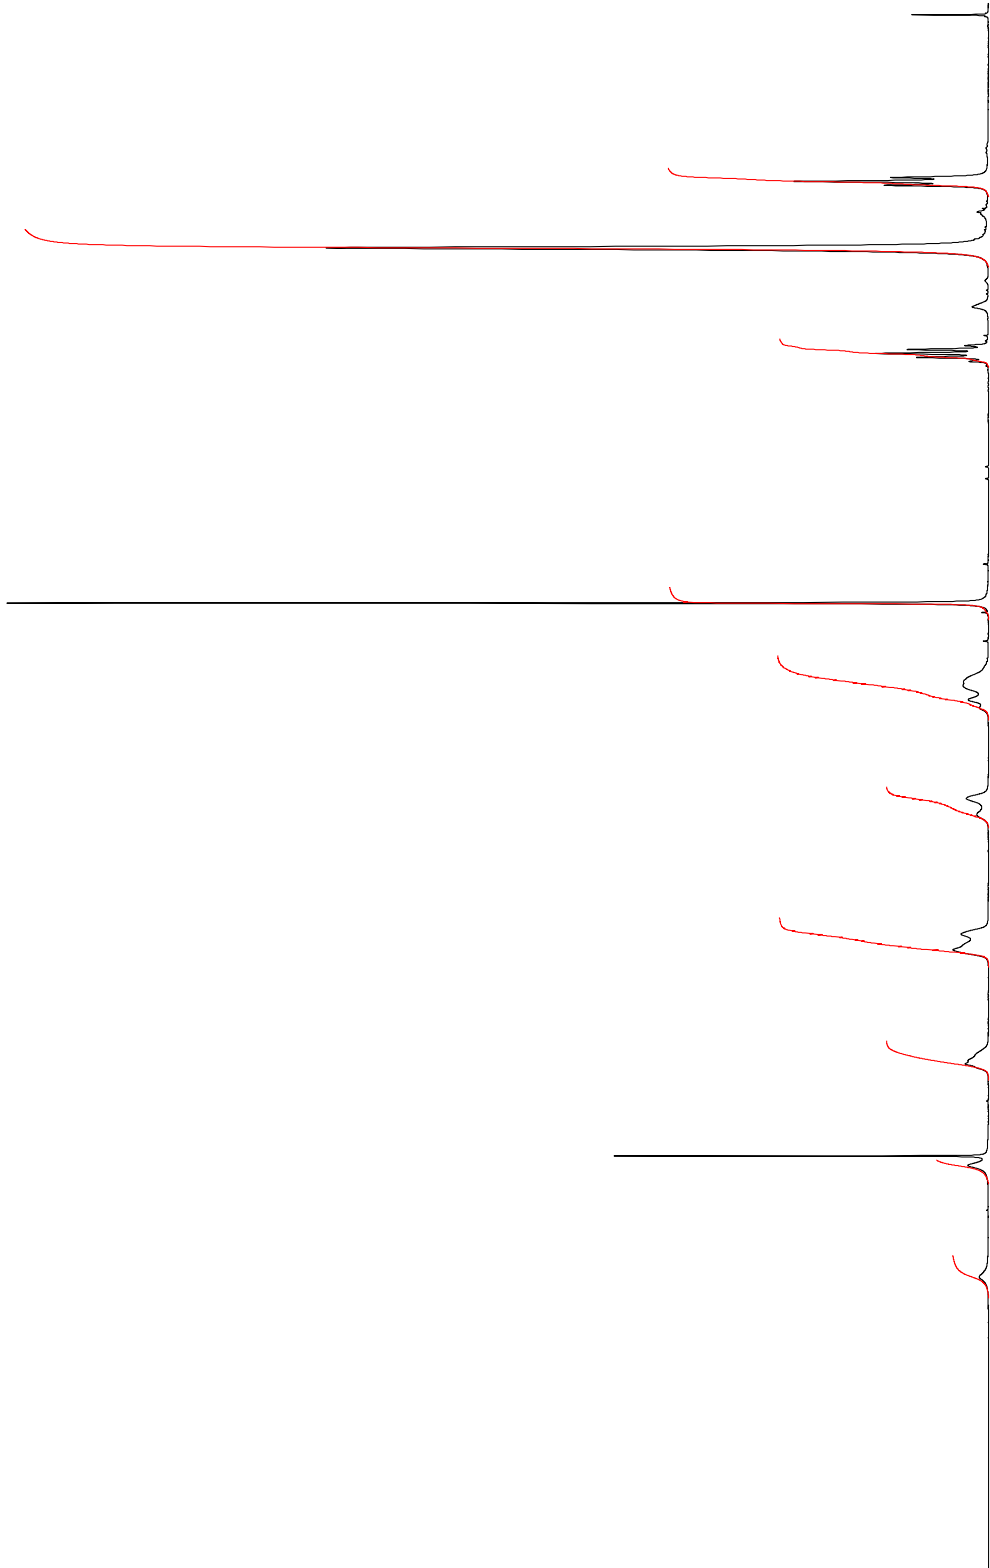

0.34  
 0.50  
 0.96  
 1.97  
 0.96  
 1.98  
 3.00  
 3.01  
 1.97  
 9.06  
 3.01  
 ppm

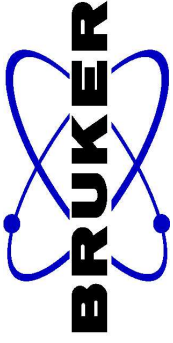

Current Data Parameters  
 NAME phomo-Z-olefin  
 EXPNO 30  
 PROCNO 1

F2 - Acquisition Parameters  
 Date\_ 20140105  
 Time 14.03  
 INSTRUM av300  
 PROBHD 5 mm PABBO BB-  
 PULPROG zgpg30  
 TD 65536  
 SOLVENT CDC13  
 NS 1024  
 DS 2  
 SWH 18028.846 Hz  
 FIDRES 0.275098 Hz  
 AQ 1.8175818 sec  
 RG 203  
 DW 27.733 usec  
 DE 6.50 usec  
 TE 291.7 K  
 D1 2.0000000 sec  
 D11 0.0300000 sec

==== CHANNEL f1 =====  
 NUC1 13C  
 P1 10.00 usec  
 PLW1 38.05099869 W  
 SFO1 75.4752953 MHz

==== CHANNEL f2 =====  
 CPDPRG2 waltz16  
 NUC2 1H  
 PCPD2 90.00 usec  
 PLW2 7.5000000 W  
 PLW12 0.20833001 W  
 PLW13 0.16875000 W  
 SFO2 300.1312005 MHz

F2 - Processing parameters  
 SI 32768  
 SF 75.4677596 MHz  
 WDW EM  
 SSB 0  
 LB 1.00 Hz  
 GB 0  
 PC 1.40

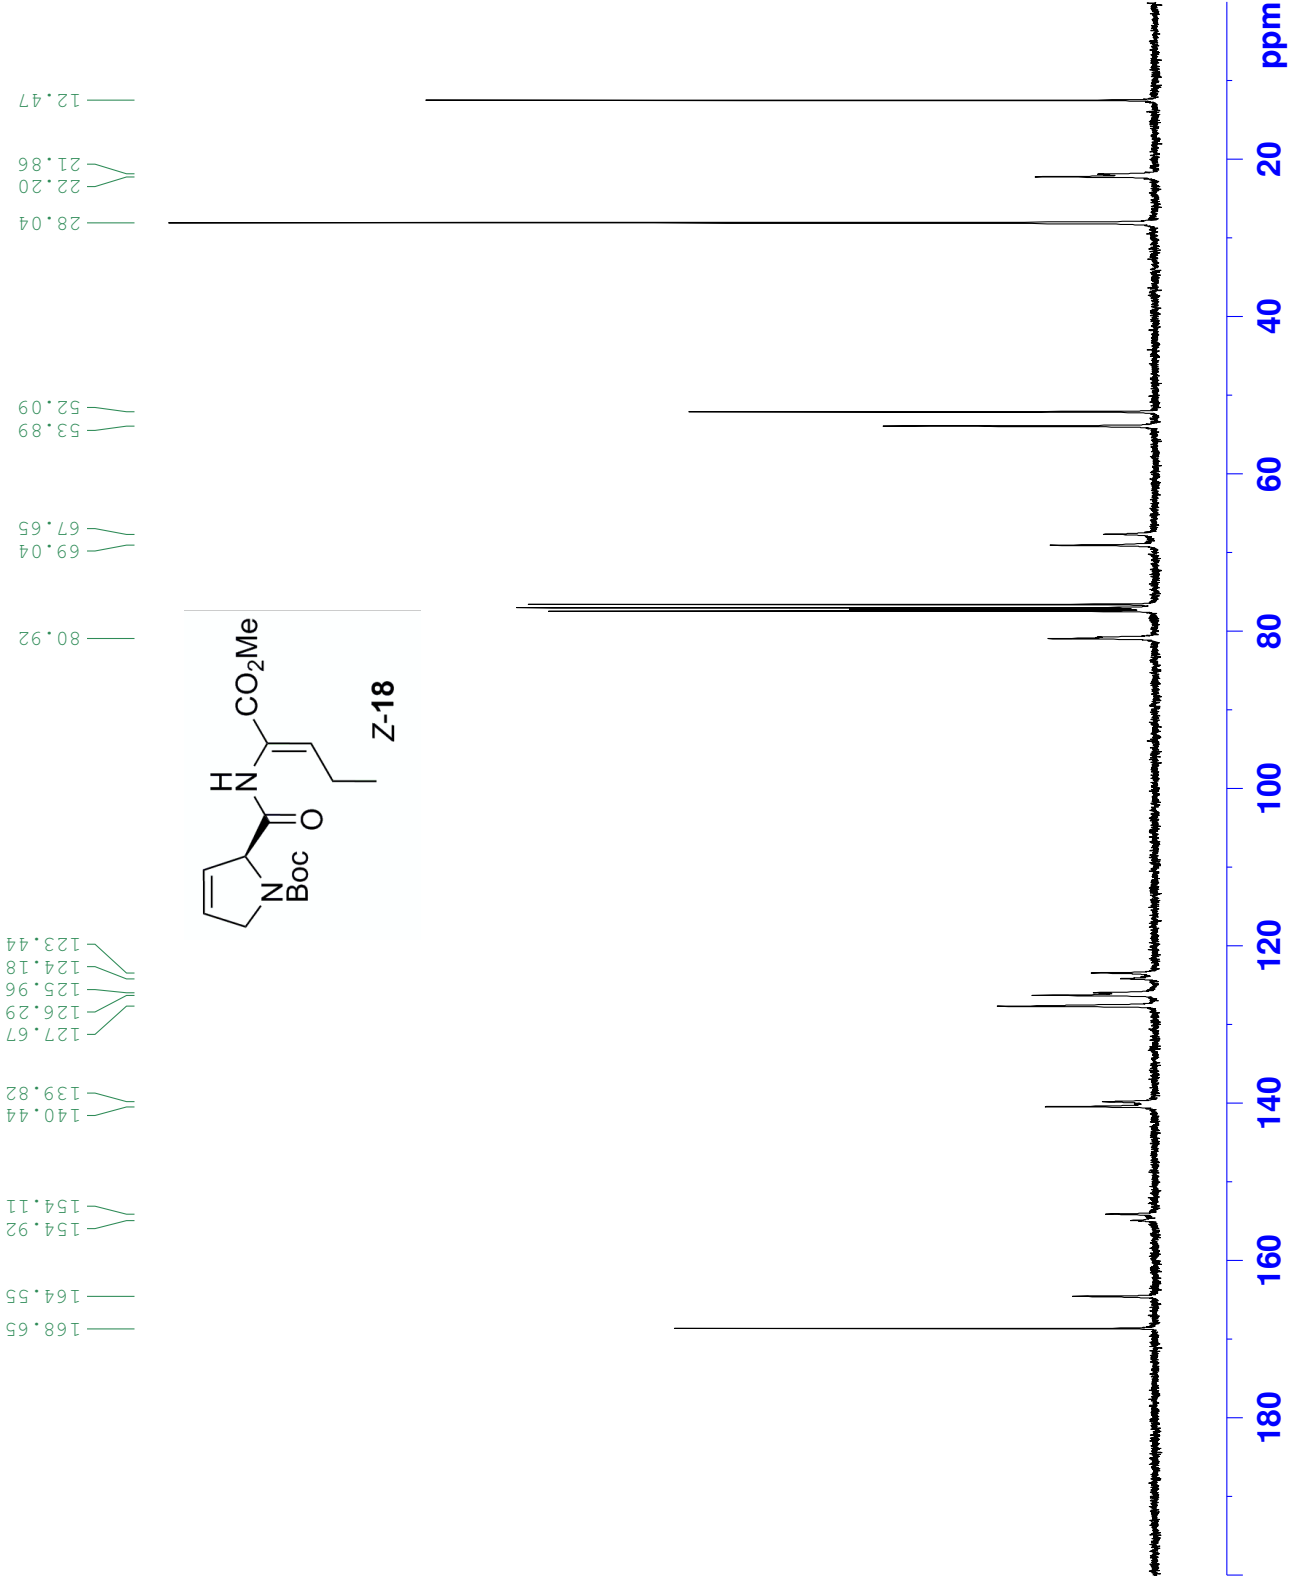



Current Data Parameters  
 NAME phomo-Z-Iodo  
 EXPNO 10  
 PROCNO 1

F2 - Acquisition Parameters  
 Date\_ 20131109  
 Time\_ 20.01  
 INSTRUM av300  
 PROBHD 5 mm PABBO BB-  
 PULPROG zg30  
 TD 65536  
 SOLVENT CDCl3  
 NS 16  
 DS 2  
 SWH 6188.119 Hz  
 FIDRES 0.094423 Hz  
 AQC 5.2953587 sec  
 RG 71.8  
 DW 80.800 usec  
 DE 6.50 usec  
 TE 292.7 K  
 D1 1.00000000 sec

==== CHANNEL f1 =====  
 NUC1 1H  
 P1 15.00 usec  
 PLW1 7.5000000 W  
 SFO1 300.1318534 MHz

F2 - Processing parameters  
 SI 32768  
 SF 300.1300059 MHz  
 WDW EM  
 SSB 0  
 LB 0.30 Hz  
 GB 0  
 PC 1.00

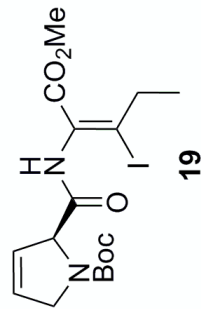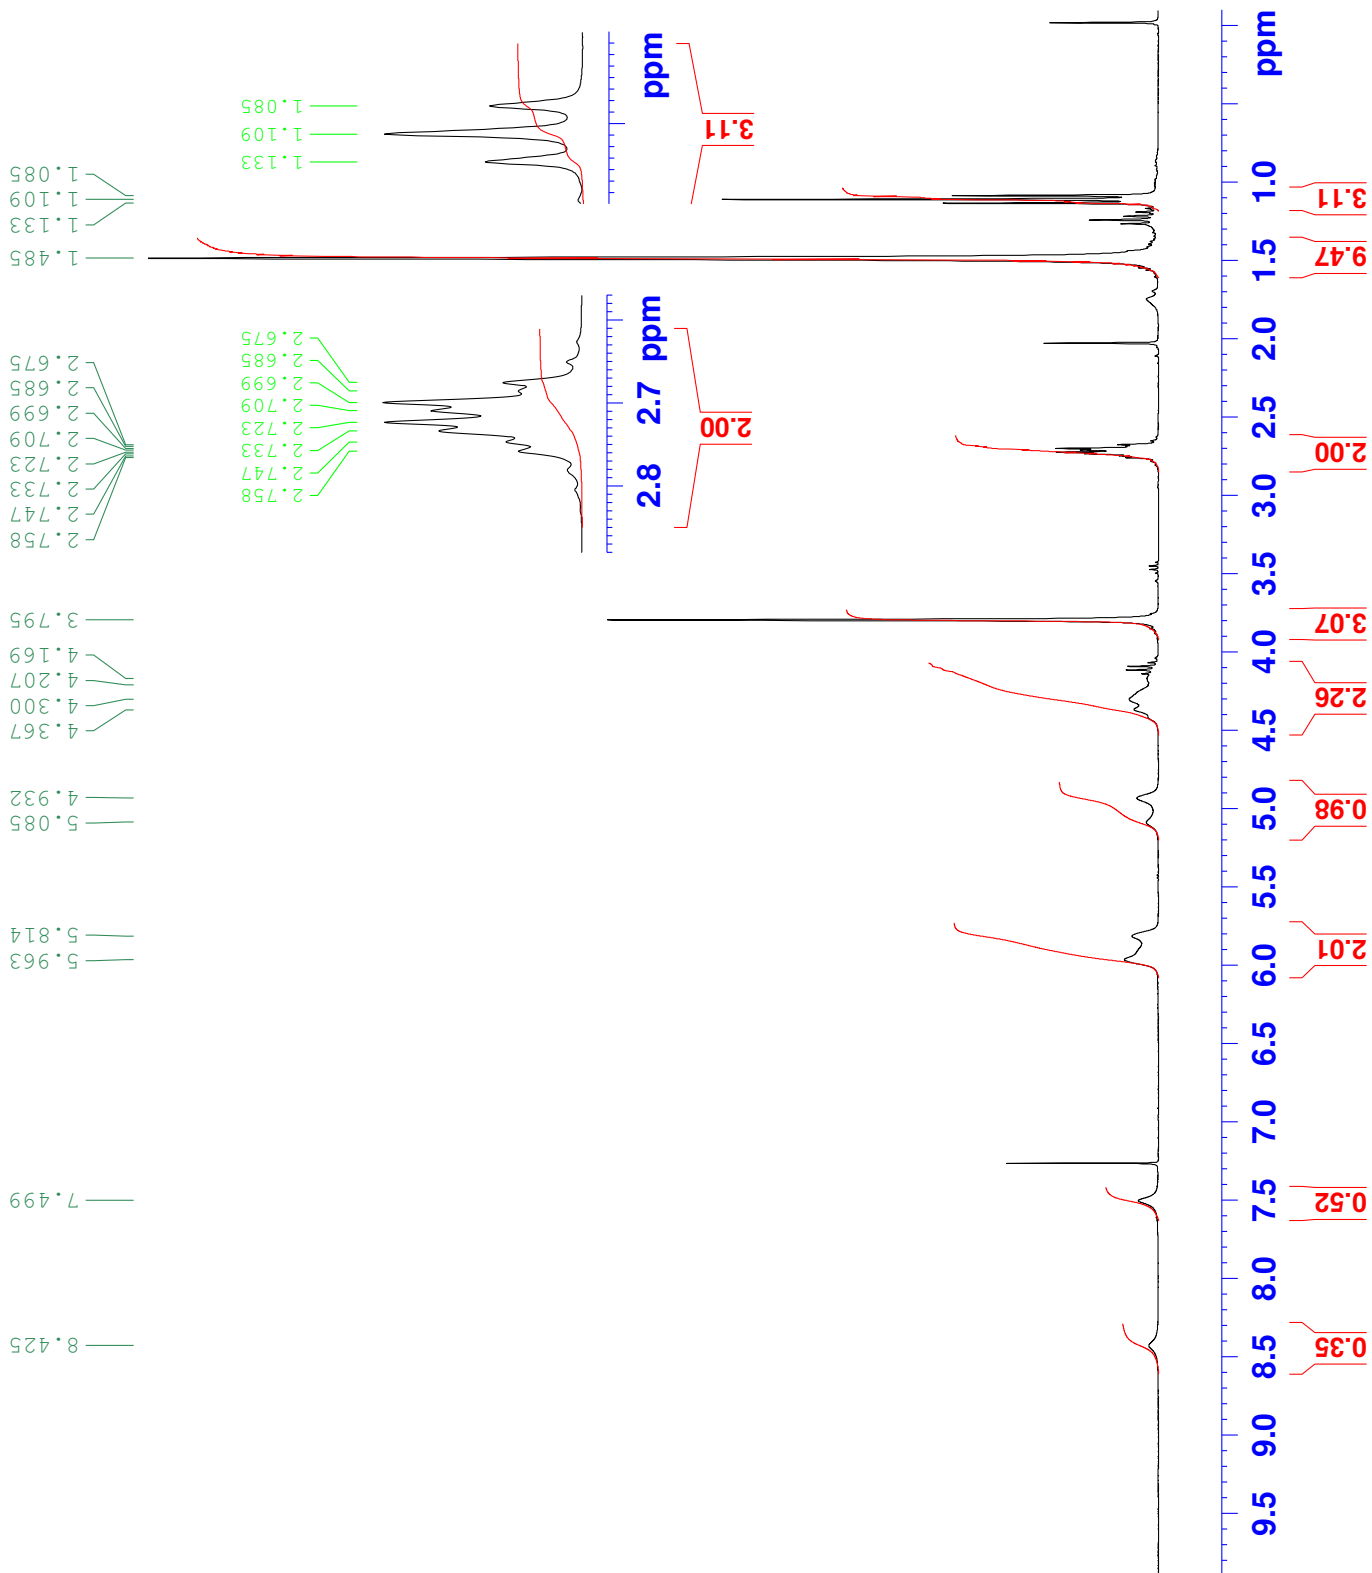

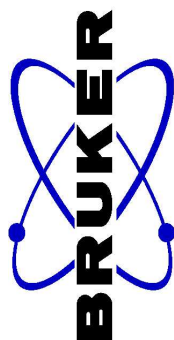

Current Data Parameters  
 NAME phomo-Z-iodo  
 EXPNO 20  
 PROCNO 1

F2 - Acquisition Parameters  
 Date\_ 20131114  
 Time 8.34  
 INSTRUM av300  
 PROBHD 5 mm PABBO BB-  
 PULPROG zgpg30  
 TD 65536  
 SOLVENT CDC13  
 NS 1600  
 DS 2  
 SWH 18028.846 Hz  
 FIDRES 0.275098 Hz  
 AQ 1.8175818 sec  
 RG 203  
 DW 27.733 usec  
 DE 6.50 usec  
 TE 293.2 K  
 D1 2.0000000 sec  
 D11 0.0300000 sec

==== CHANNEL f1 =====  
 NUC1 13C  
 P1 10.00 usec  
 PLW1 38.05099869 W  
 SFO1 75.4752953 MHz

==== CHANNEL f2 =====  
 CPDPRG2 waltz16  
 NUC2 1H  
 P2 90.00 usec  
 PLW2 7.50000000 W  
 PLW12 0.20833001 W  
 PLW13 0.16875000 W  
 SFO2 300.1312005 MHz

F2 - Processing parameters  
 SI 32768  
 SF 75.4677564 MHz  
 WDW EM  
 SSB 0  
 LB 1.00 Hz  
 GB 0  
 PC 1.40

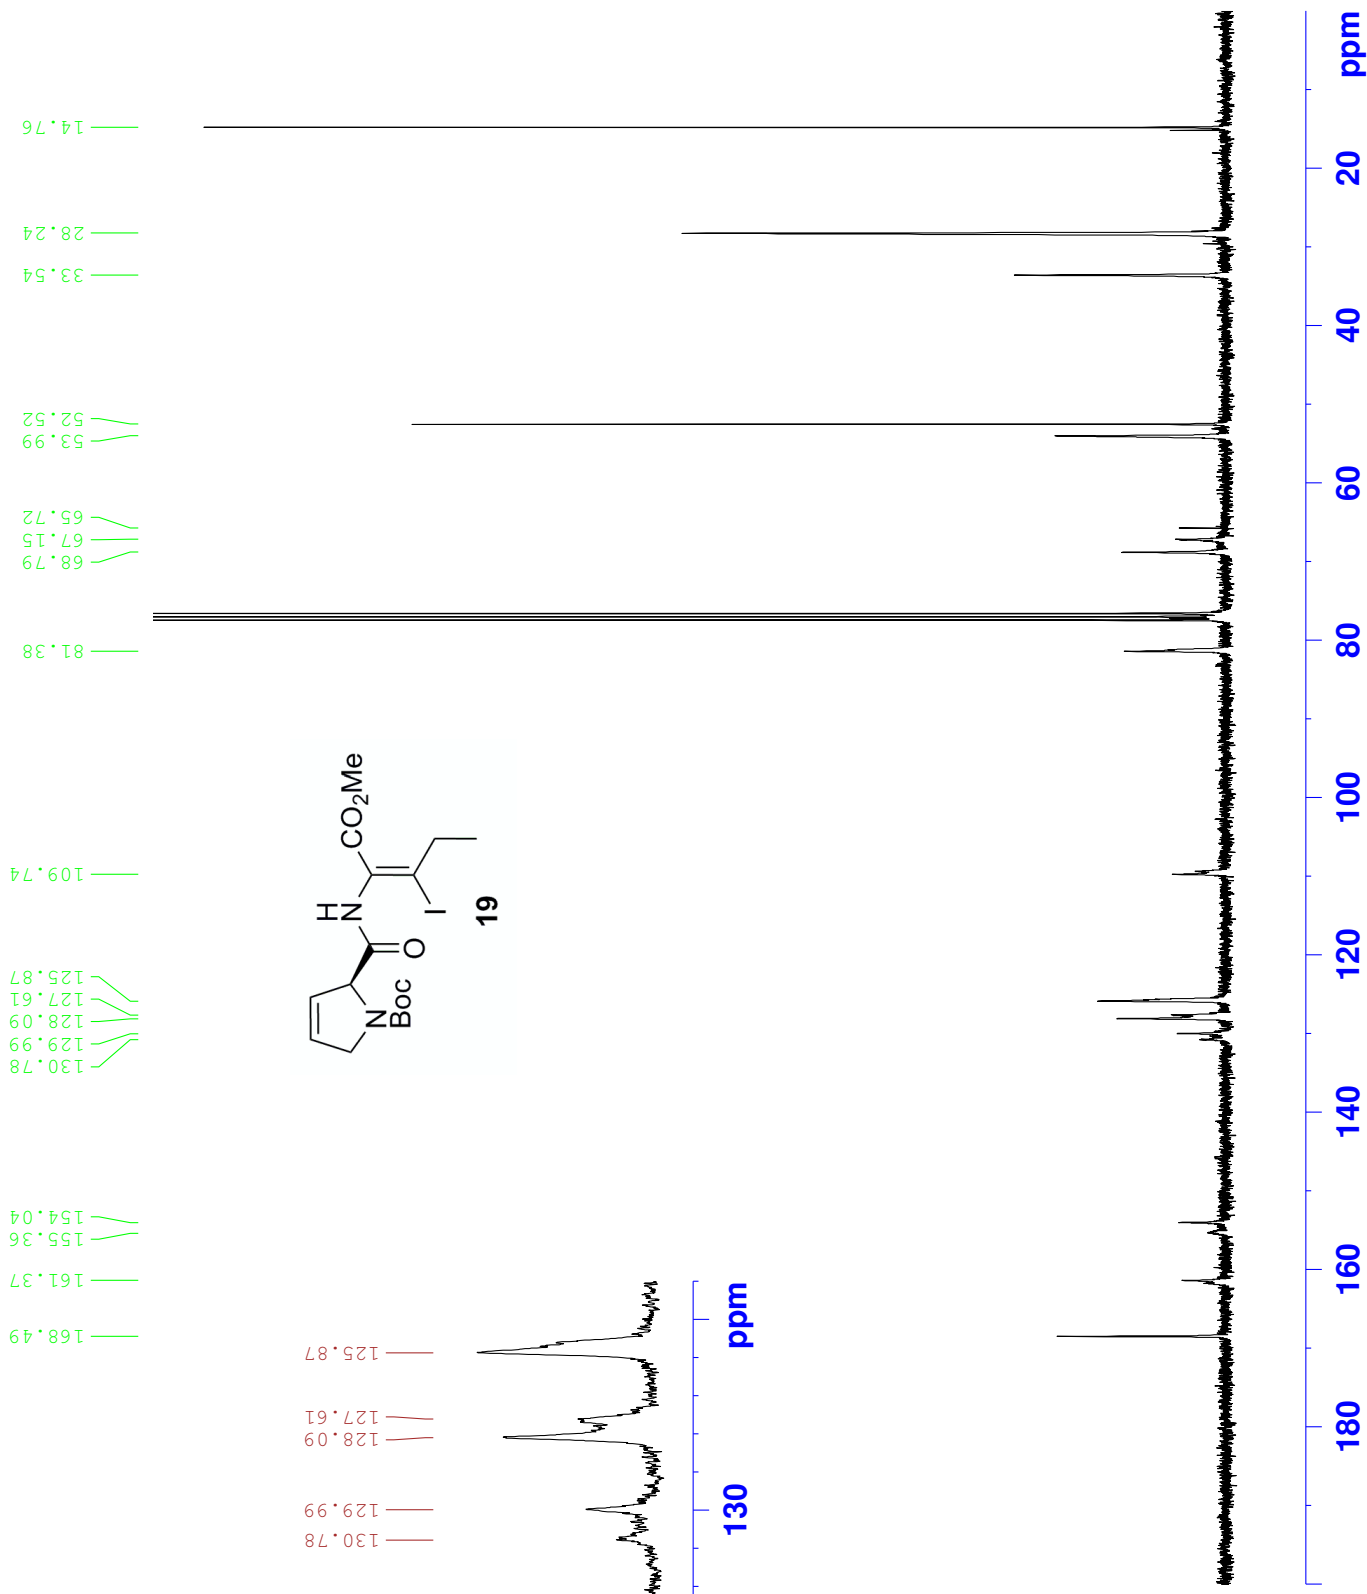



Current Data Parameters  
 NAME Pro-1le  
 EXPNO 20  
 PROCNO 1

F2 - Acquisition Parameters  
 Date\_ 20140101  
 Time\_ 16.11  
 INSTRUM av300  
 PROBHD 5 mm PABBO BB-  
 PULPROG zg30  
 TD 65536  
 SOLVENT CDCl3  
 NS 16  
 DS 2  
 SWH 6188.119 Hz  
 FIDRES 0.094423 Hz  
 AQ 5.2953587 sec  
 RG 128  
 DW 80.800 usec  
 DE 6.50 usec  
 TE 291.8 K  
 D1 1.00000000 sec

==== CHANNEL f1 =====  
 NUC1 1H  
 P1 15.00 usec  
 PLW1 7.5000000 W  
 SFO1 300.1318534 MHz

F2 - Processing parameters  
 SI 32768  
 SF 300.1300060 MHz  
 WDW EM  
 SSB 0  
 LB 0.30 Hz  
 GB 0  
 PC 1.00

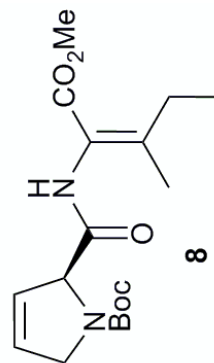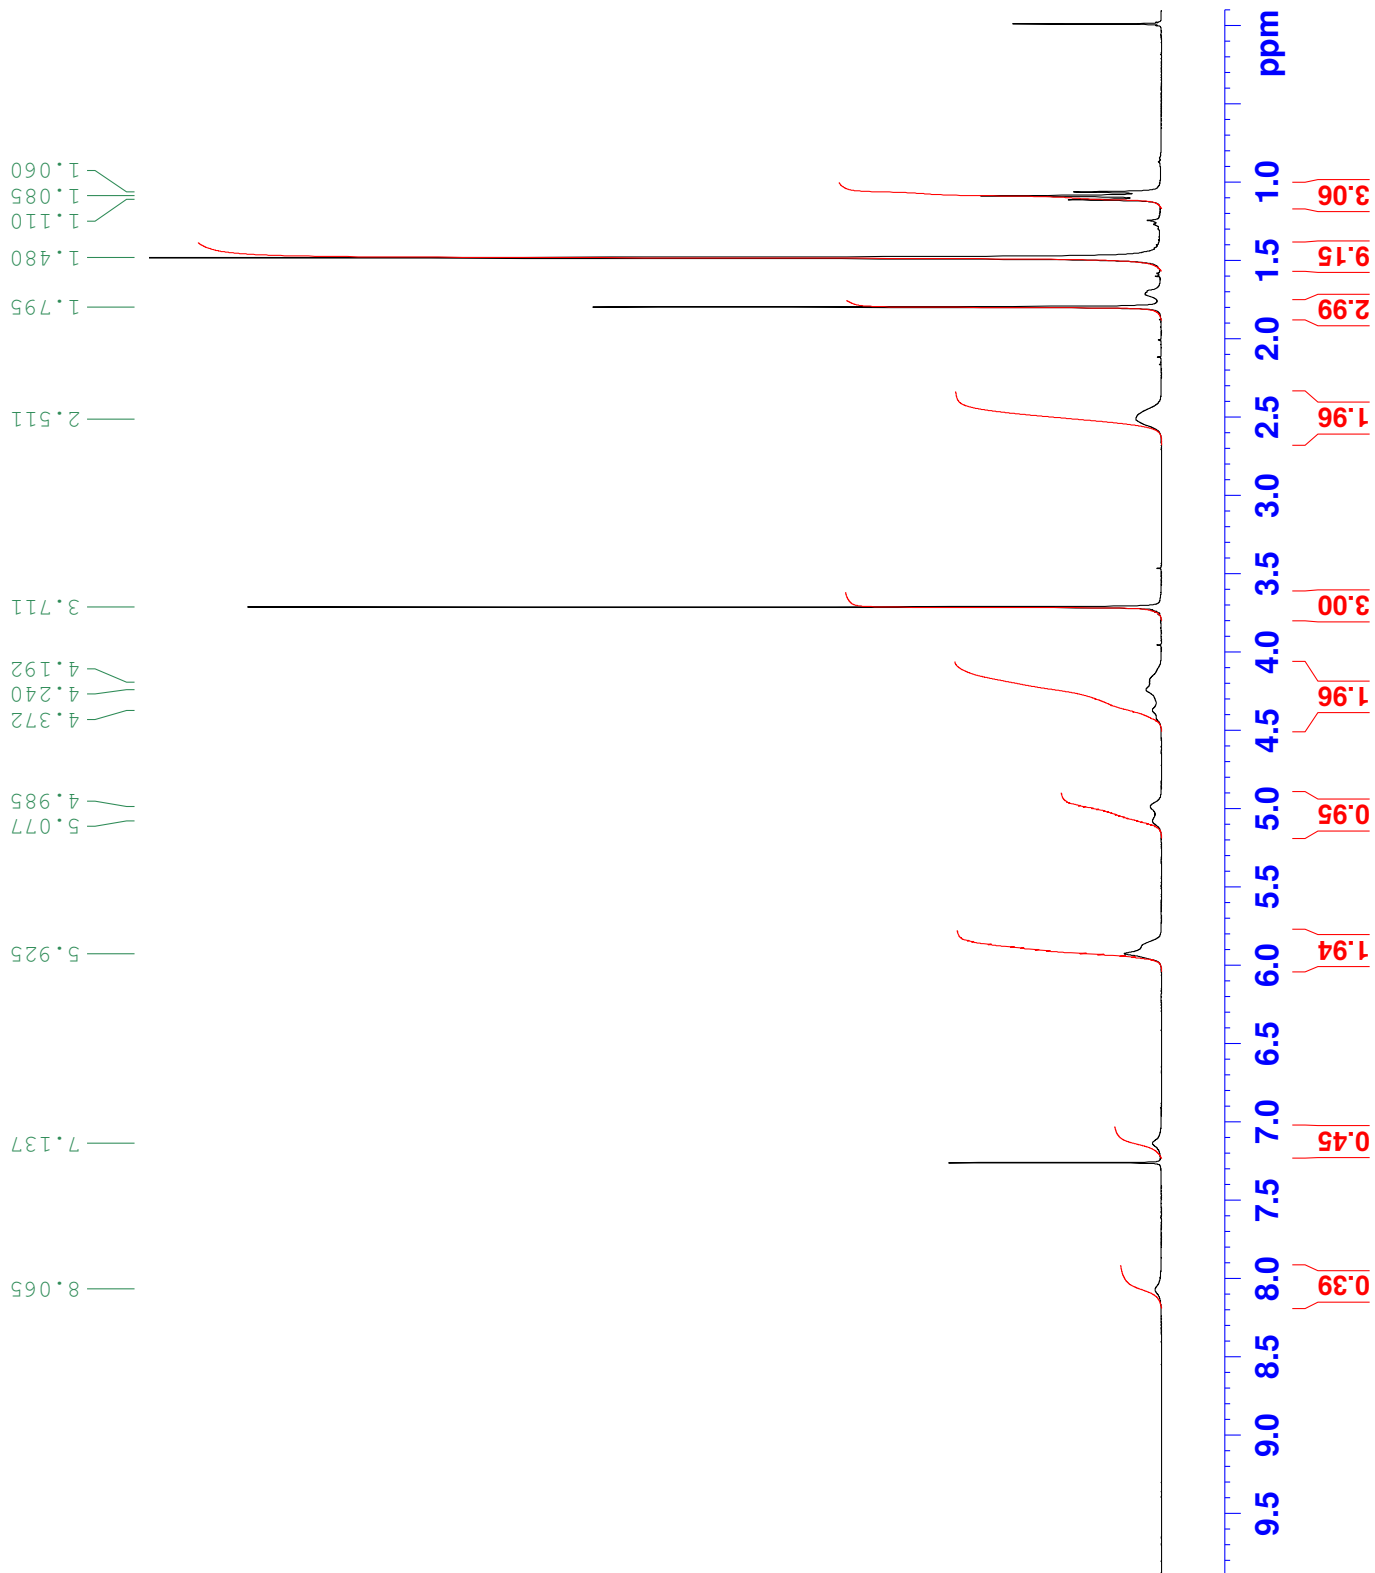



Current Data Parameters  
 NAME 15-60  
 EXPNO 10  
 PROCNO 1

F2 - Acquisition Parameters

Date\_ 20131119  
 Time 9.43  
 INSTRUM av300  
 PROBHD 5 mm PABBO BB-  
 PULPROG zgpg30  
 TD 65536  
 SOLVENT CDC13  
 NS 7452  
 DS 2  
 SWH 18028.846 Hz  
 FIDRES 0.275098 Hz  
 AQ 1.8175818 sec  
 RG 203  
 DW 27.733 usec  
 DE 6.50 usec  
 TE 293.6 K  
 D1 2.0000000 sec  
 D11 0.0300000 sec

==== CHANNEL f1 =====  
 NUC1 13C  
 P1 10.00 usec  
 PLW1 38.05099869 W  
 SFO1 75.4752953 MHz

==== CHANNEL f2 =====  
 CPDPRG2 waltz16  
 NUC2 1H  
 P2 90.00 usec  
 PLW2 7.5000000 W  
 PLW12 0.20833001 W  
 PLW13 0.16875000 W  
 SFO2 300.1312005 MHz

F2 - Processing parameters  
 SI 32768  
 SF 75.4677549 MHz  
 WDW EM  
 SSB 0  
 LB 1.00 Hz  
 GB 0  
 PC 1.40

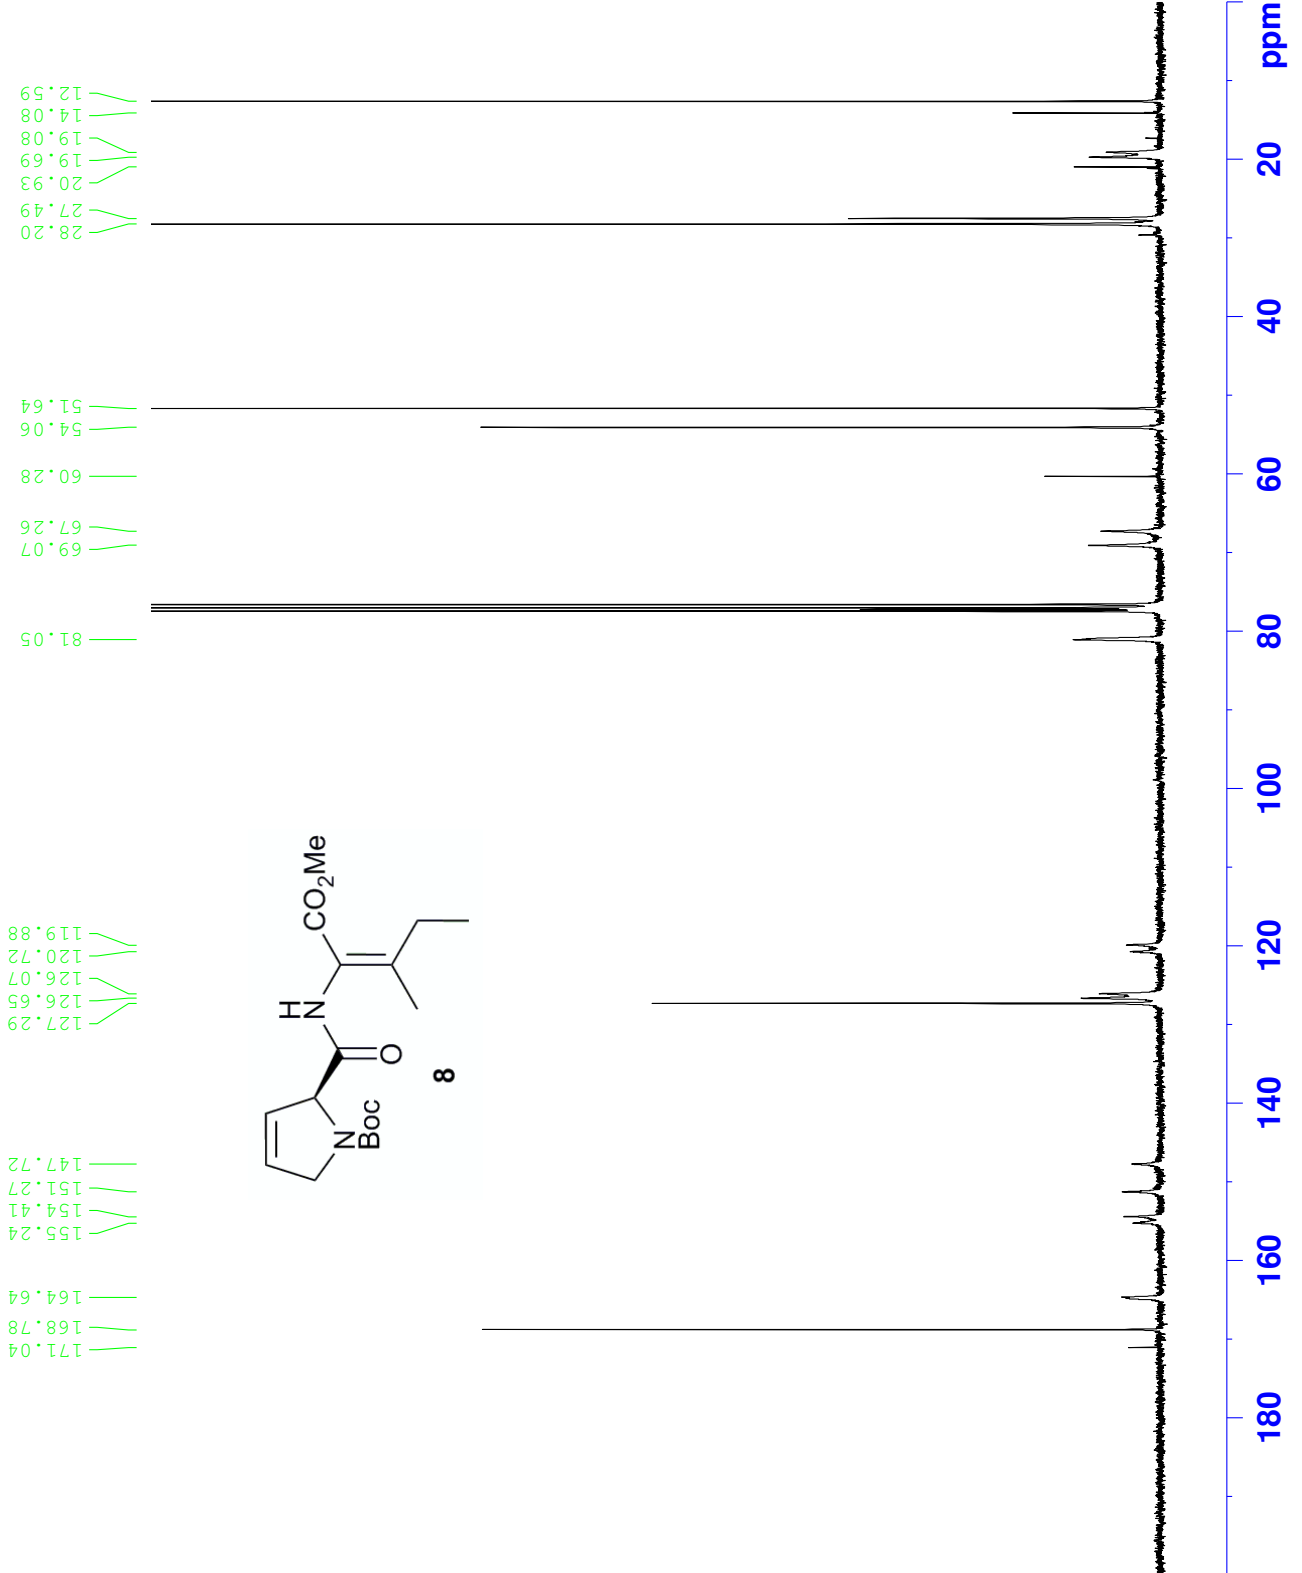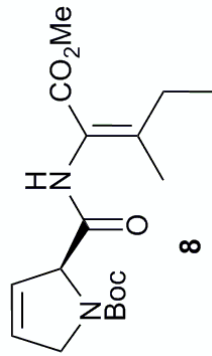





Current Data Parameters  
 NAME allylester  
 EXPNO 10  
 PROCNO 1

F2 - Acquisition Parameters  
 Date\_ 20140105  
 Time 12.42  
 INSTRUM av300  
 PROBHD 5 mm PABBO BB-  
 PULPROG zg30  
 TD 65536  
 SOLVENT CDCl3  
 NS 16  
 DS 2  
 SWH 6188.119 Hz  
 FIDRES 0.094423 Hz  
 AQ 5.2953587 sec  
 RG 50.8  
 DW 80.800 usec  
 DE 6.50 usec  
 TE 290.7 K  
 D1 1.00000000 sec

==== CHANNEL f1 =====  
 NUC1 1H  
 P1 15.00 usec  
 PLW1 7.5000000 W  
 SFO1 300.1318534 MHz

F2 - Processing parameters  
 SI 32768  
 SF 300.1300058 MHz  
 WDW EM  
 SSB 0  
 LB 0.30 Hz  
 GB 0  
 PC 1.00

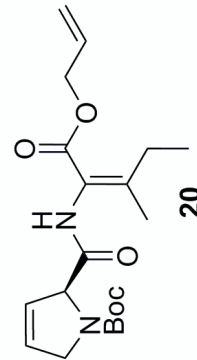

8.032  
7.171  
5.952  
5.932  
5.913  
5.898  
5.876  
5.859  
5.841  
5.822  
5.814  
5.309  
5.256  
5.251  
5.210  
5.176  
5.064  
4.997  
4.979  
4.968  
4.665  
4.661  
4.657  
4.642  
4.638  
4.621  
4.617  
4.612  
4.608  
4.603  
4.599  
4.589  
4.585  
4.564  
4.564  
4.559  
4.555  
4.544  
4.540  
4.354  
4.223  
4.165  
2.494  
2.479  
2.455  
1.804  
1.462  
1.101  
1.076  
1.051

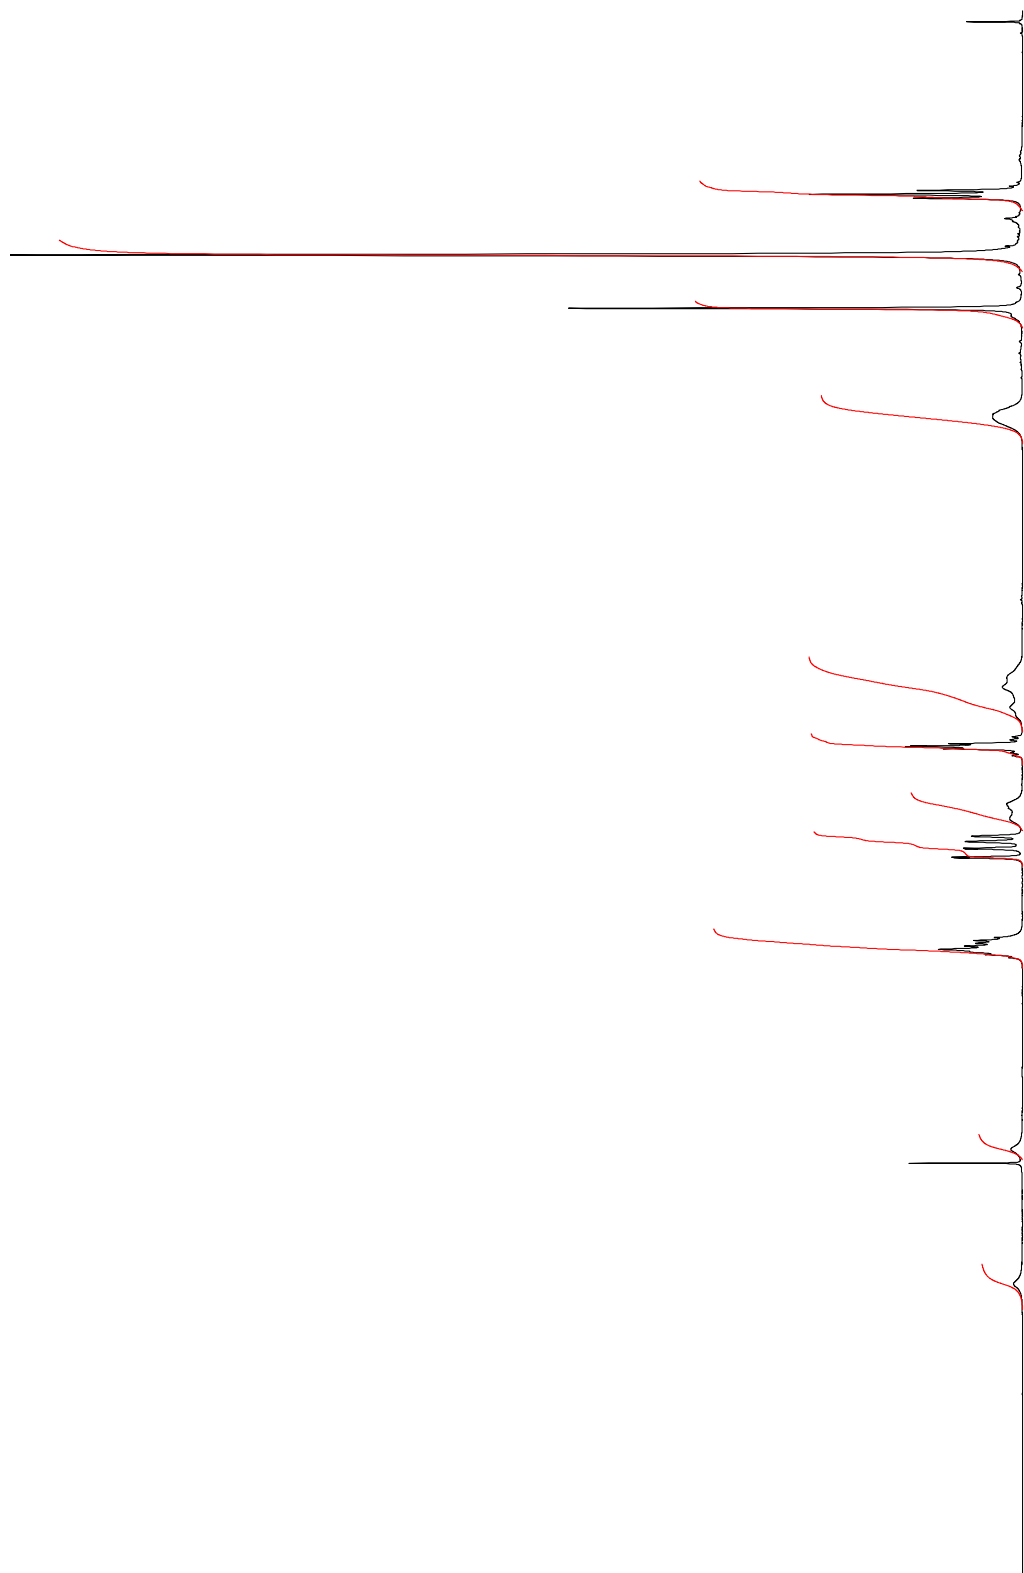

9.5 9.0 8.5 8.0 7.5 7.0 6.5 6.0 5.5 5.0 4.5 4.0 3.5 3.0 2.5 2.0 1.5 1.0 ppm

0.39  
0.42  
1.97  
2.00  
2.02  
1.91  
3.10  
9.12  
3.06



Current Data Parameters  
 NAME allylester  
 EXPNO 20  
 PROCNO 1

F2 - Acquisition Parameters  
 Date\_ 20140105  
 Time 15.22  
 INSTRUM av300  
 PROBHD 5 mm PABBO BB-  
 PULPROG zgpg30  
 TD 65536  
 SOLVENT CDC13  
 NS 1200  
 DS 2  
 SWH 18028.846 Hz  
 FIDRES 0.275098 Hz  
 AQ 1.8175818 sec  
 RG 203  
 DW 27.733 usec  
 DE 6.50 usec  
 TE 292.0 K  
 D1 2.0000000 sec  
 D11 0.0300000 sec

==== CHANNEL f1 =====  
 NUC1 13C  
 P1 10.00 usec  
 PLW1 38.05099869 W  
 SFO1 75.4752953 MHz

==== CHANNEL f2 =====  
 CPDPRG2 waltz16  
 NUC2 1H  
 P2 90.00 usec  
 PLW2 7.5000000 W  
 PLW12 0.20833001 W  
 PLW13 0.16875000 W  
 SFO2 300.1312005 MHz

F2 - Processing parameters  
 SI 32768  
 SF 75.4677570 MHz  
 WDW EM  
 SSB 0  
 LB 1.00 Hz  
 GB 0  
 FC 1.40

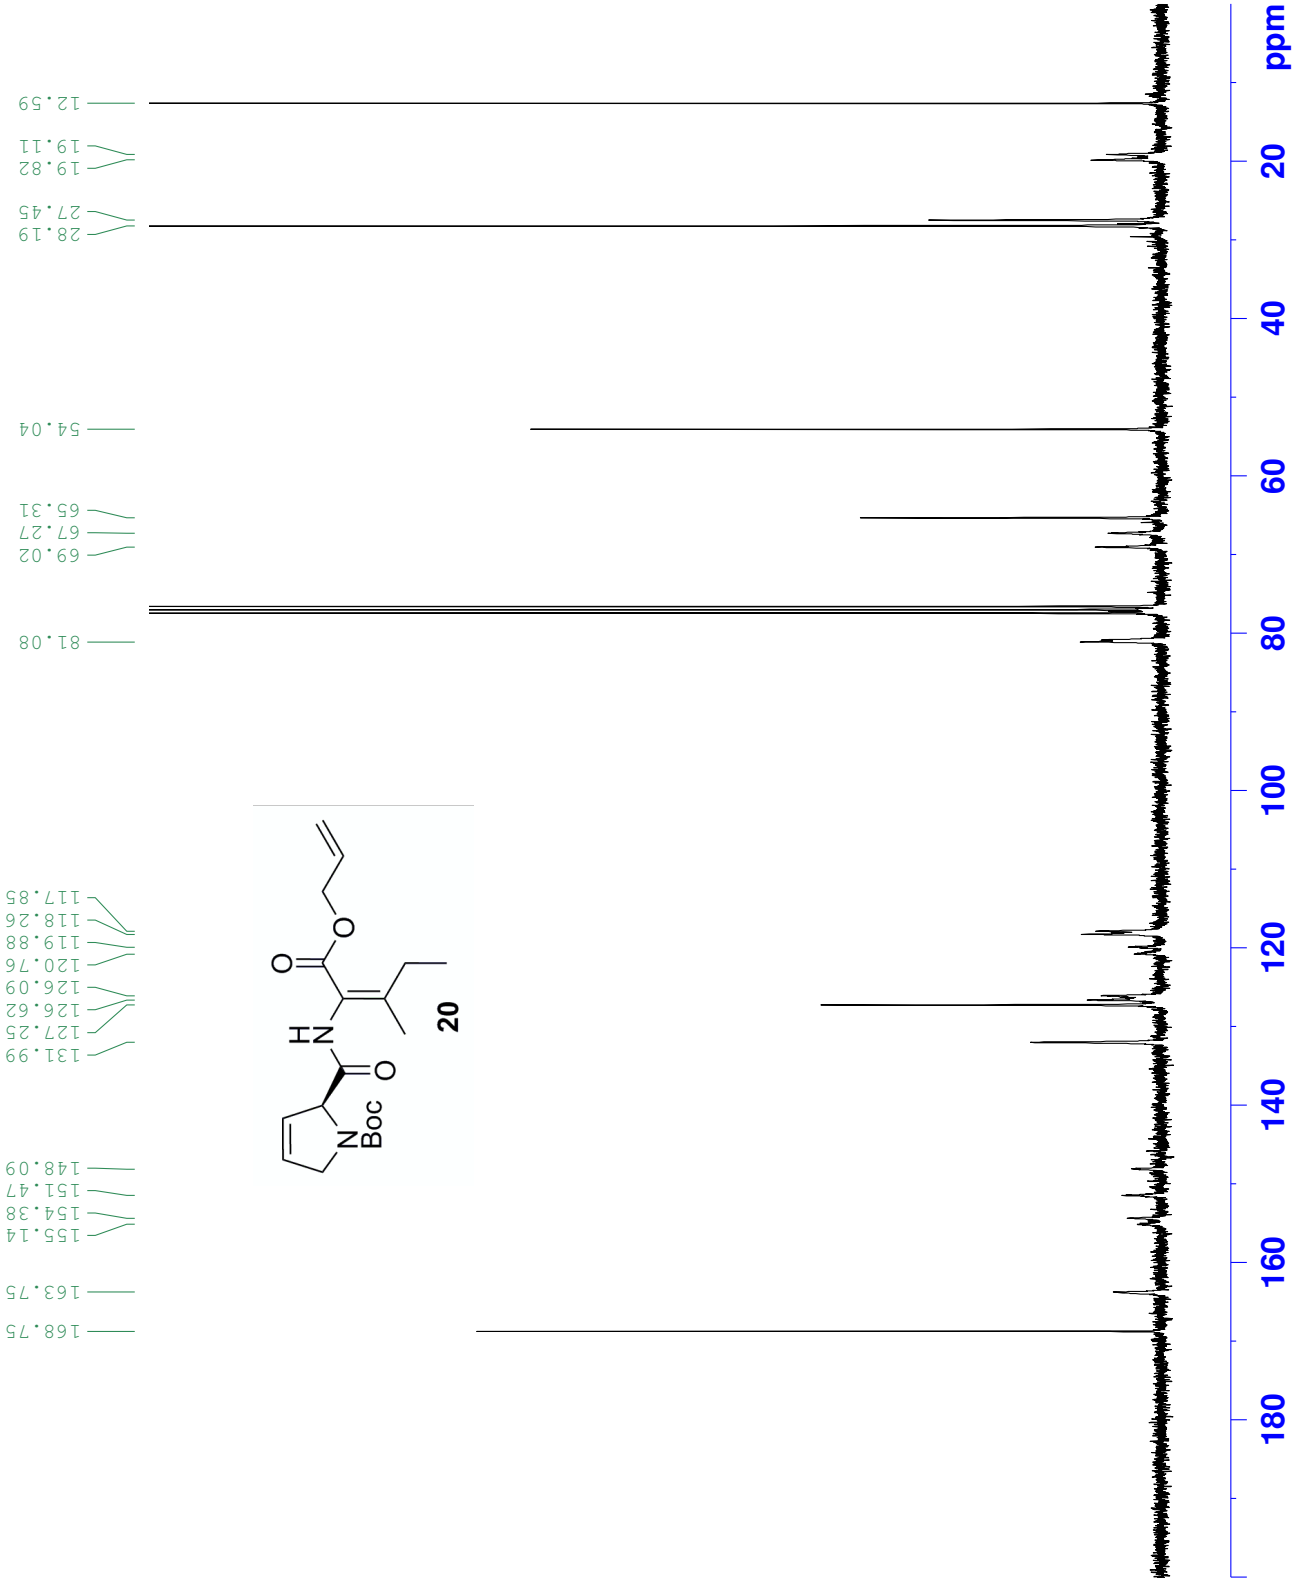



Current Data Parameters  
 NAME phomo-Boc-Oallyl1  
 EXPNO 10  
 PROCNO 1

F2 - Acquisition Parameters  
 Date\_ 20131109  
 Time\_ 20.05  
 INSTRUM av300  
 PROBHD 5 mm PABBO BB-  
 PULPROG zg30  
 TD 65536  
 SOLVENT CDCl3  
 NS 16  
 DS 2  
 SWH 6188.119 Hz  
 FIDRES 0.094423 Hz  
 AQ 5.2953587 sec  
 RG 203  
 DW 80.800 usec  
 DE 6.50 usec  
 TE 293.0 K  
 D1 1.00000000 sec

==== CHANNEL f1 =====  
 NUC1 1H  
 P1 15.00 usec  
 PLW1 7.5000000 W  
 SFO1 300.1318534 MHz

F2 - Processing parameters  
 SI 32768  
 SF 300.1300068 MHz  
 WDW EM  
 SSB 0  
 LB 0.30 Hz  
 GB 0  
 PC 1.00

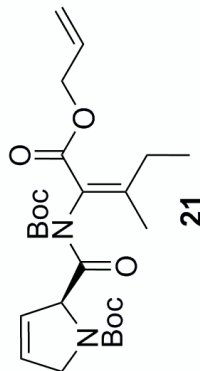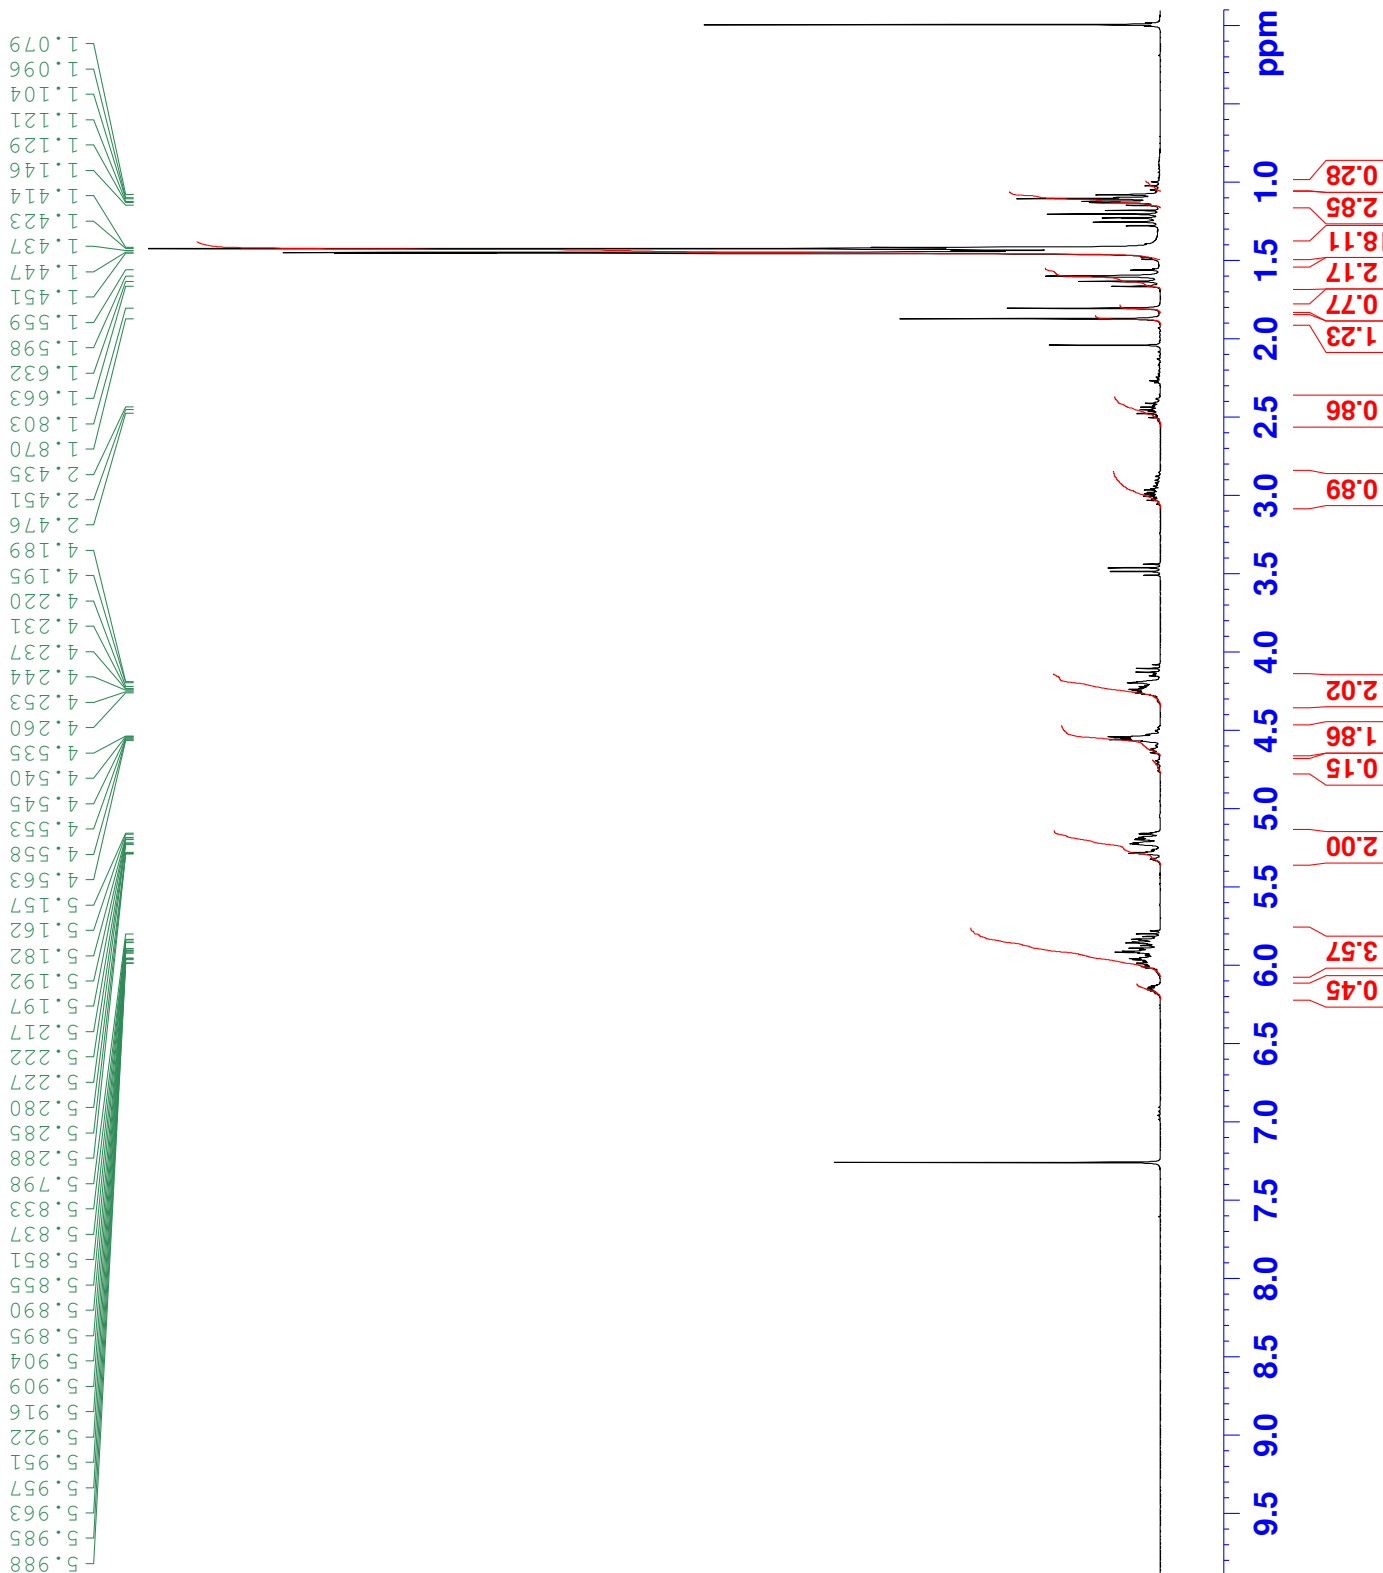



Current Data Parameters  
 NAME phomo-Boc-Oallyl1  
 EXPNO 30  
 PROCNO 1

F2 - Acquisition Parameters  
 Date\_ 20131114  
 Time 10.57  
 INSTRUM av300  
 PROBHD 5 mm PABBO BB-  
 PULPROG zgpg30  
 TD 65536  
 SOLVENT CDC13  
 NS 901  
 DS 2  
 SWH 18028.846 Hz  
 FIDRES 0.275098 Hz  
 AQ 1.8175818 sec  
 RG 203  
 DW 27.733 usec  
 DE 6.50 usec  
 TE 293.3 K  
 D1 2.0000000 sec  
 D11 0.0300000 sec

==== CHANNEL f1 =====  
 NUC1 13C  
 P1 10.00 usec  
 PLW1 38.05099869 W  
 SFO1 75.4752953 MHz

==== CHANNEL f2 =====  
 CPDPRG2 waltz16  
 NUC2 1H  
 P2 90.00 usec  
 PLW2 7.5000000 W  
 PLW12 0.20833001 W  
 PLW13 0.16875000 W  
 SFO2 300.1312005 MHz

F2 - Processing parameters  
 SI 32768  
 SF 75.4677566 MHz  
 WDW EM  
 SSB 0  
 LB 1.00 Hz  
 GB 0  
 PC 1.40

172.79  
171.71  
171.52  
171.07  
162.88  
162.78  
162.50  
158.22  
156.85  
155.64  
153.65  
153.34  
151.94  
151.78  
132.34  
131.77  
129.19  
129.07  
128.62  
128.46  
125.83  
125.64  
125.42  
125.18  
122.96  
122.84  
122.46  
122.23  
118.03  
117.94  
117.52  
117.32  
83.27  
82.99  
79.55  
79.40  
79.20  
68.80  
68.48  
68.36  
65.03  
64.80  
53.70  
53.47  
53.04  
28.26  
28.08  
27.62  
27.36  
20.36  
20.27  
19.69  
19.55  
12.06

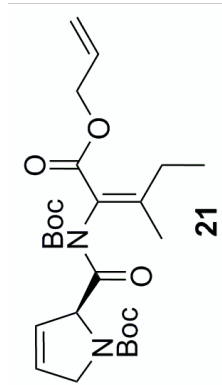

180 160 140 120 100 80 60 40 20 ppm

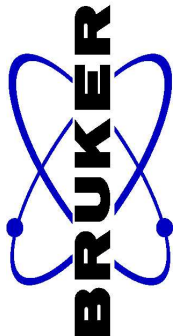

Current Data Parameters  
 NAME 15-59  
 EXPNO 20  
 PROCNO 1

F2 - Acquisition Parameters  
 Date\_ 20131118  
 Time 16.37  
 INSTRUM av300  
 PROBHD 5 mm PABBO BB-  
 PULPROG zg30  
 TD 65536  
 SOLVENT CDCl3  
 NS 16  
 DS 2  
 SWH 6188.119 Hz  
 FIDRES 0.094423 Hz  
 AQ 5.2953587 sec  
 RG 203  
 DW 80.800 usec  
 DE 6.50 usec  
 TE 292.7 K  
 D1 1.00000000 sec

==== CHANNEL f1 =====  
 NUC1 1H  
 P1 15.00 usec  
 PLW1 7.5000000 W  
 SFO1 300.1318534 MHz  
 F2 - Processing parameters  
 SI 32768  
 SF 300.1300062 MHz  
 WDW EM  
 SSB 0  
 LB 0.30 Hz  
 GB 0  
 PC 1.00

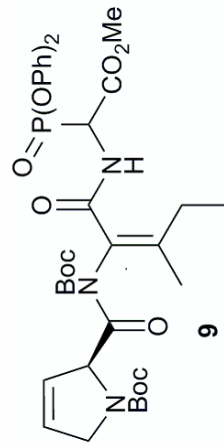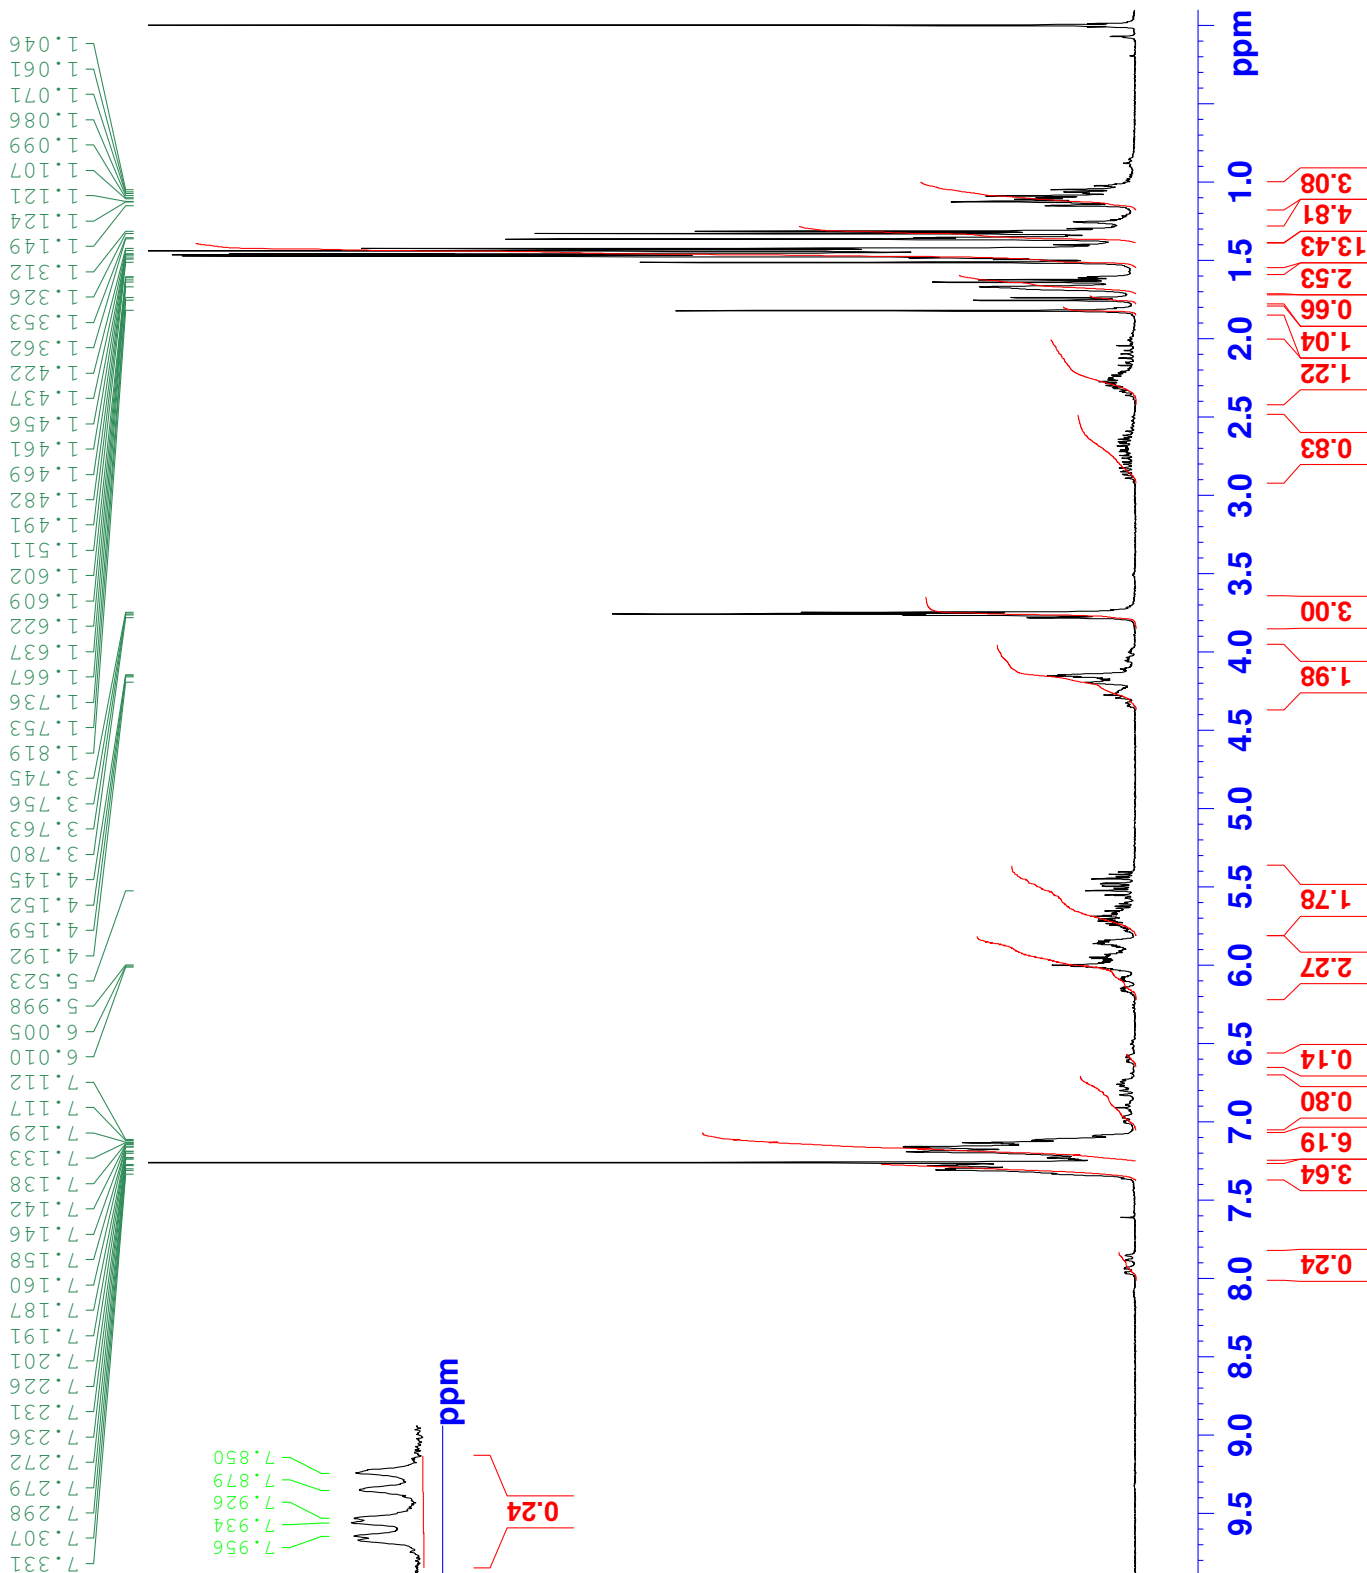



Current Data Parameters  
 NAME 15-59  
 EXPNO 40  
 PROCNO 1

F2 - Acquisition Parameters  
 Date\_ 20131119  
 Time 1.38  
 INSTRUM av300  
 PROBHD 5 mm PABBO BB-  
 PULPROG zgpg30  
 TD 65536  
 SOLVENT CDC13  
 NS 5120  
 DS 2  
 SWH 18028.846 Hz  
 FIDRES 0.275098 Hz  
 AQ 1.8175818 sec  
 RG 203  
 DW 27.733 usec  
 DE 6.50 usec  
 TE 293.5 K  
 D1 2.0000000 sec  
 D11 0.0300000 sec

==== CHANNEL f1 =====  
 NUC1 13C  
 P1 10.00 usec  
 PLW1 38.05099869 W  
 SFO1 75.4752953 MHz

==== CHANNEL f2 =====  
 CPDPRG2 waltz16  
 NUC2 1H  
 PCPD2 90.00 usec  
 PLW2 7.5000000 W  
 PLW12 0.20833001 W  
 PLW13 0.16875000 W  
 SFO2 300.1312005 MHz

F2 - Processing parameters  
 SI 32768  
 SF 75.4677785 MHz  
 WDW EM  
 SSB 0  
 LB 1.00 Hz  
 GB 0  
 PC 1.40

165.75  
153.61  
153.39  
149.70  
149.54  
149.42  
149.38  
149.26  
149.26  
129.50  
129.42  
129.36  
129.22  
129.17  
129.12  
128.92  
125.39  
125.26  
125.06  
124.90  
124.83  
124.72  
124.25  
124.10  
123.96  
123.68  
120.63  
120.57  
120.44  
120.39  
120.29  
120.22  
120.16  
120.09  
119.99  
115.03  
84.26  
84.00  
83.81  
83.71  
79.94  
79.48  
79.36  
76.37  
68.13  
68.08  
68.02  
53.44  
53.39  
53.08  
52.96  
52.55  
51.27  
49.26  
28.03  
27.98  
27.91  
27.84  
27.68  
27.26  
27.11  
18.70  
18.56  
18.45  
18.36  
17.85  
12.04  
12.01

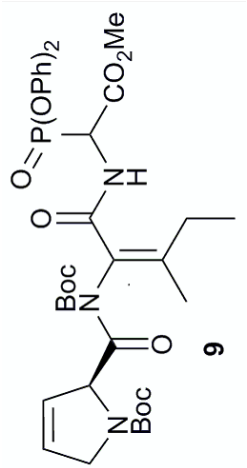

173.80  
173.31  
172.29  
172.00  
171.95  
171.56

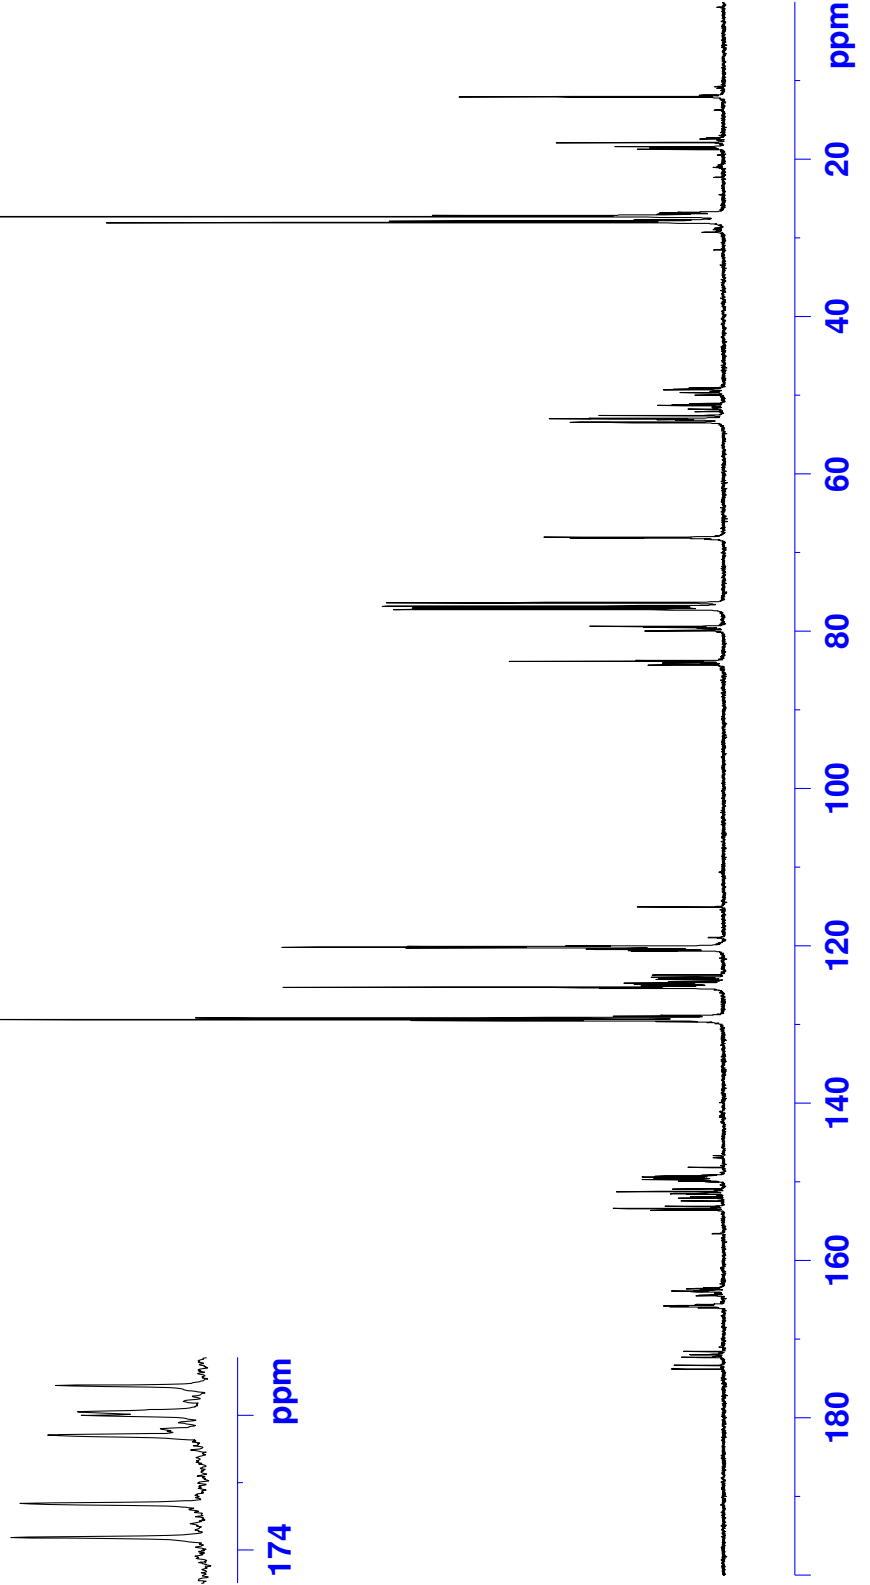



Current Data Parameters  
 NAME phomo-tripeptide  
 EXPNO 10  
 PROCNO 1

F2 - Acquisition Parameters  
 Date\_ 20131221  
 Time\_ 15.09  
 INSTRUM av300  
 PROBHD 5 mm PABBO BB-  
 PULPROG zg30  
 TD 65536  
 SOLVENT CDCl3  
 NS 32  
 DS 2  
 SWH 6188.119 Hz  
 FIDRES 0.094423 Hz  
 AQ 5.2953587 sec  
 RG 32  
 DW 80.800 usec  
 DE 6.50 usec  
 TE 292.7 K  
 D1 1.00000000 sec

==== CHANNEL f1 =====  
 NUC1 1H  
 P1 15.00 usec  
 PLW1 7.5000000 W  
 SFO1 300.1318534 MHz

F2 - Processing parameters  
 SI 32768  
 SF 300.1300062 MHz  
 WDW EM  
 SSB 0  
 LB 0.30 Hz  
 GB 0  
 PC 1.00

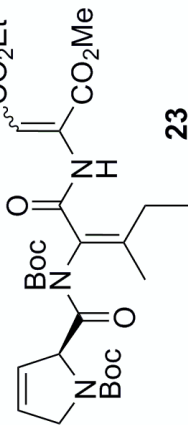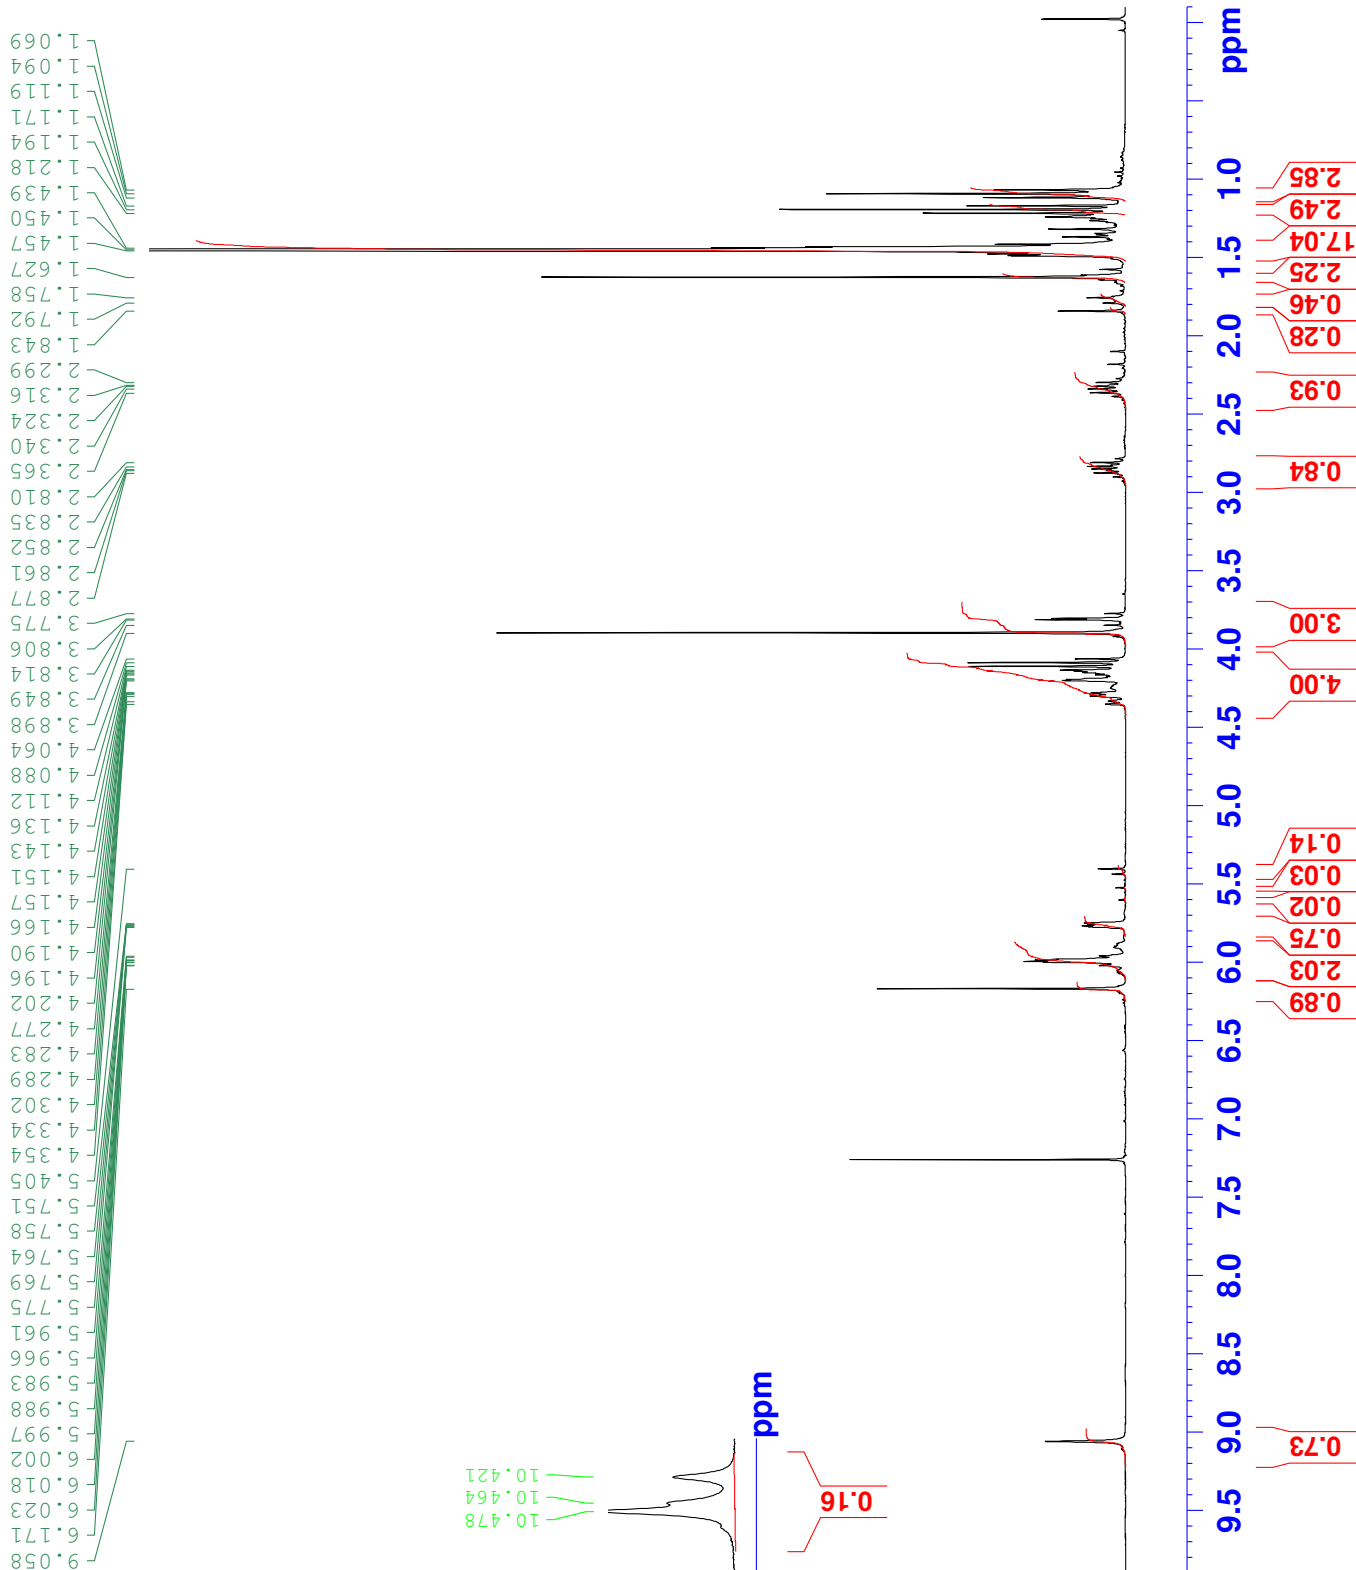

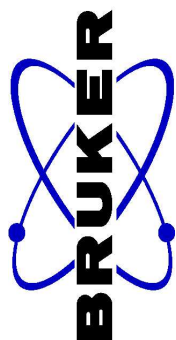

Current Data Parameters  
 NAME 15-67  
 EXPNO 10  
 PROCNO 1

F2 - Acquisition Parameters  
 Date\_ 20131128  
 Time 8.12  
 INSTRUM av300  
 PROBHD 5 mm PABBO BB-  
 PULPROG zgpg30  
 TD 65536  
 SOLVENT CDC13  
 NS 5000  
 DS 2  
 SWH 18028.846 Hz  
 FIDRES 0.275098 Hz  
 AQ 1.8175818 sec  
 RG 203  
 DW 27.733 usec  
 DE 6.50 usec  
 TE 293.3 K  
 D1 2.00000000 sec  
 D11 0.03000000 sec

==== CHANNEL f1 =====  
 NUC1 13C  
 P1 10.00 usec  
 PLW1 38.05099869 W  
 SFO1 75.4752953 MHz

==== CHANNEL f2 =====  
 CPDPRG2 waltz16  
 NUC2 1H  
 PCPD2 90.00 usec  
 PLW2 7.50000000 W  
 PLW12 0.20833001 W  
 PLW13 0.16875000 W  
 SFO2 300.1312005 MHz

F2 - Processing parameters  
 SI 32768  
 SF 75.4677559 MHz  
 WDW EM  
 SSB 0  
 LB 1.00 Hz  
 GB 0  
 PC 1.40

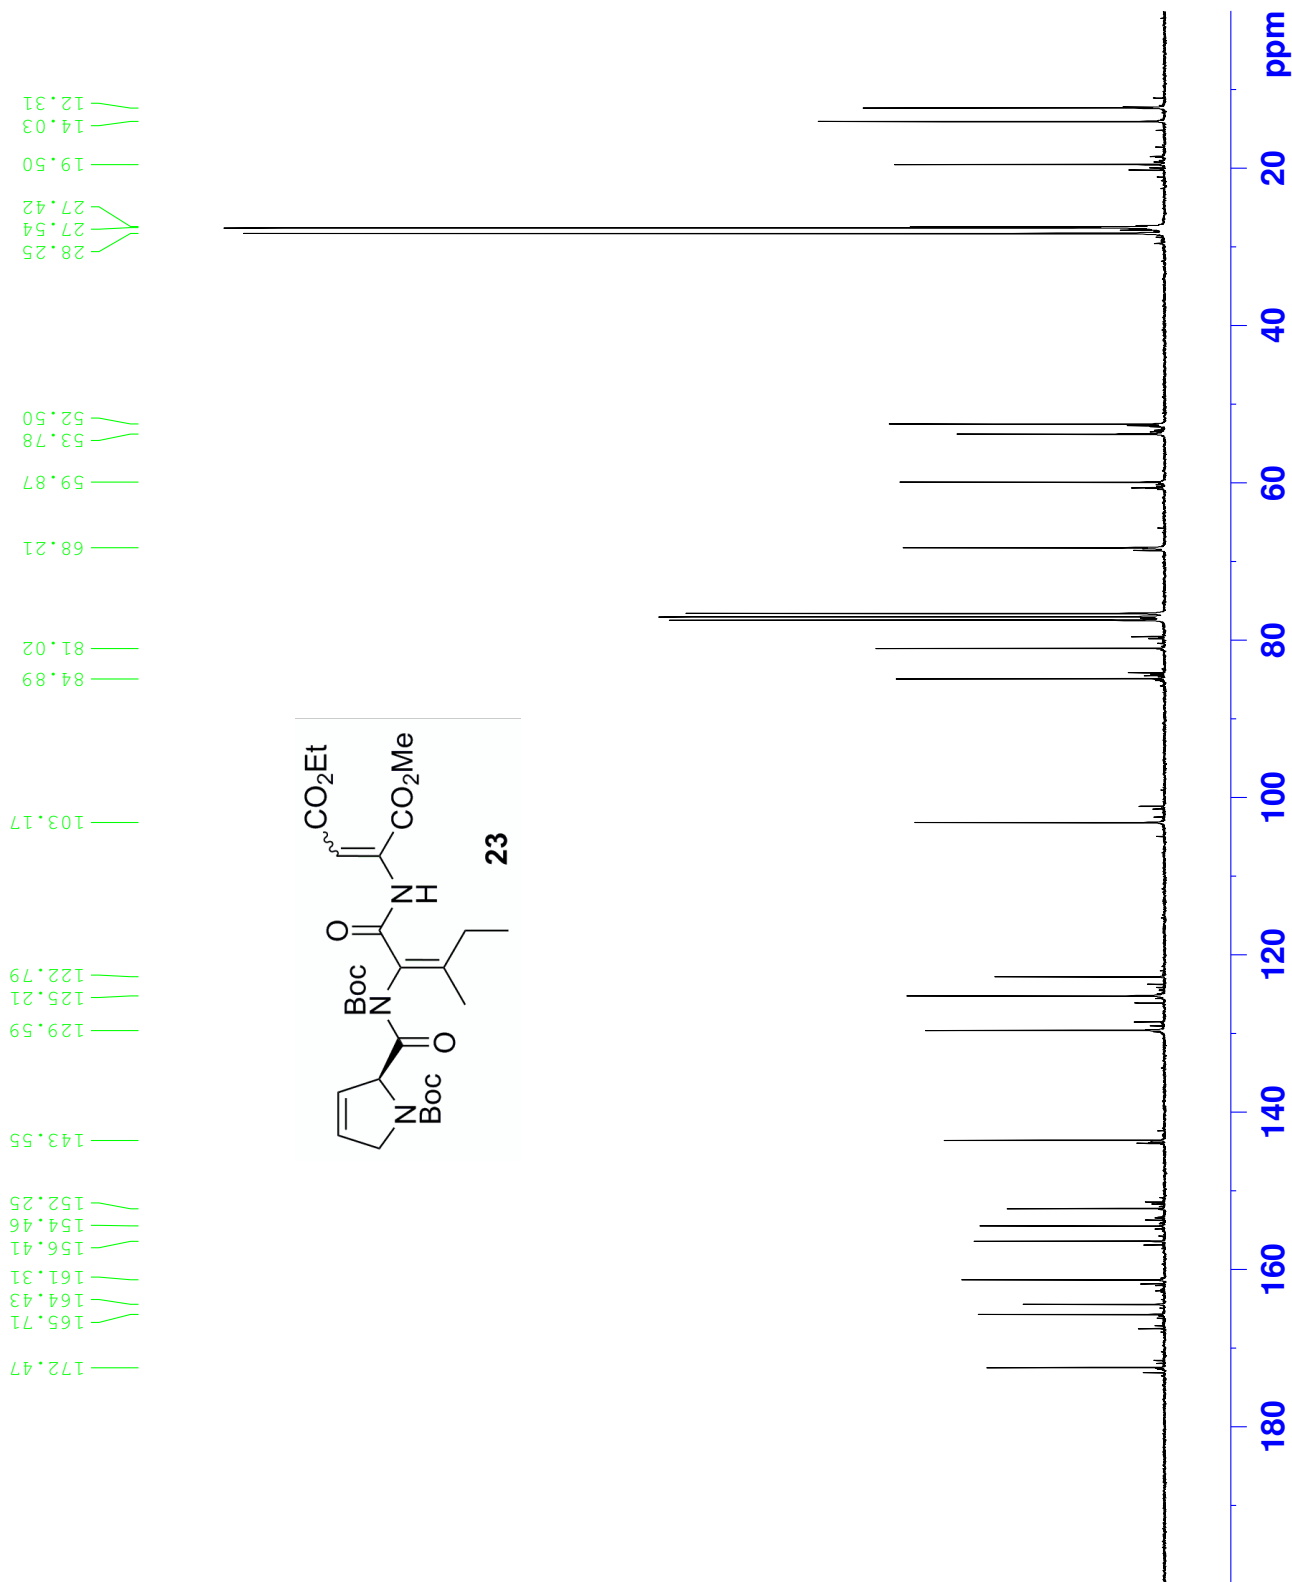





Current Data Parameters  
 NAME PLC-4  
 EXPNO 10  
 PROCNO 1

F2 - Acquisition Parameters  
 Date\_ 20151011  
 Time\_ 13.56  
 INSTRUM av300  
 PROBHD 5 mm PABBO BB-  
 PULPROG zg30  
 TD 65536  
 SOLVENT MeOD  
 NS 16  
 DS 2  
 SWH 6188.119 Hz  
 FIDRES 0.094423 Hz  
 AQ 5.2953587 sec  
 RG 203  
 DW 80.800 usec  
 DE 6.50 usec  
 TE 294.4 K  
 D1 1.00000000 sec

==== CHANNEL f1 =====  
 NUC1 1H  
 P1 15.00 usec  
 PLW1 7.5000000 W  
 SFO1 300.1318534 MHz

F2 - Processing parameters  
 SI 32768  
 SF 300.1300048 MHz  
 WDW EM  
 SSB 0  
 LB 0.30 Hz  
 GB 0  
 PC 1.00

6.049  
6.016  
6.010  
6.002  
5.996  
5.990  
5.983  
5.977  
5.888  
5.881  
5.873  
5.862  
5.854  
5.847  
4.587  
4.167  
4.143  
4.120  
4.096  
3.876  
3.831  
2.397  
2.372  
2.347  
2.322  
1.768  
1.290  
1.277  
1.253  
1.229  
1.112  
1.087  
1.062

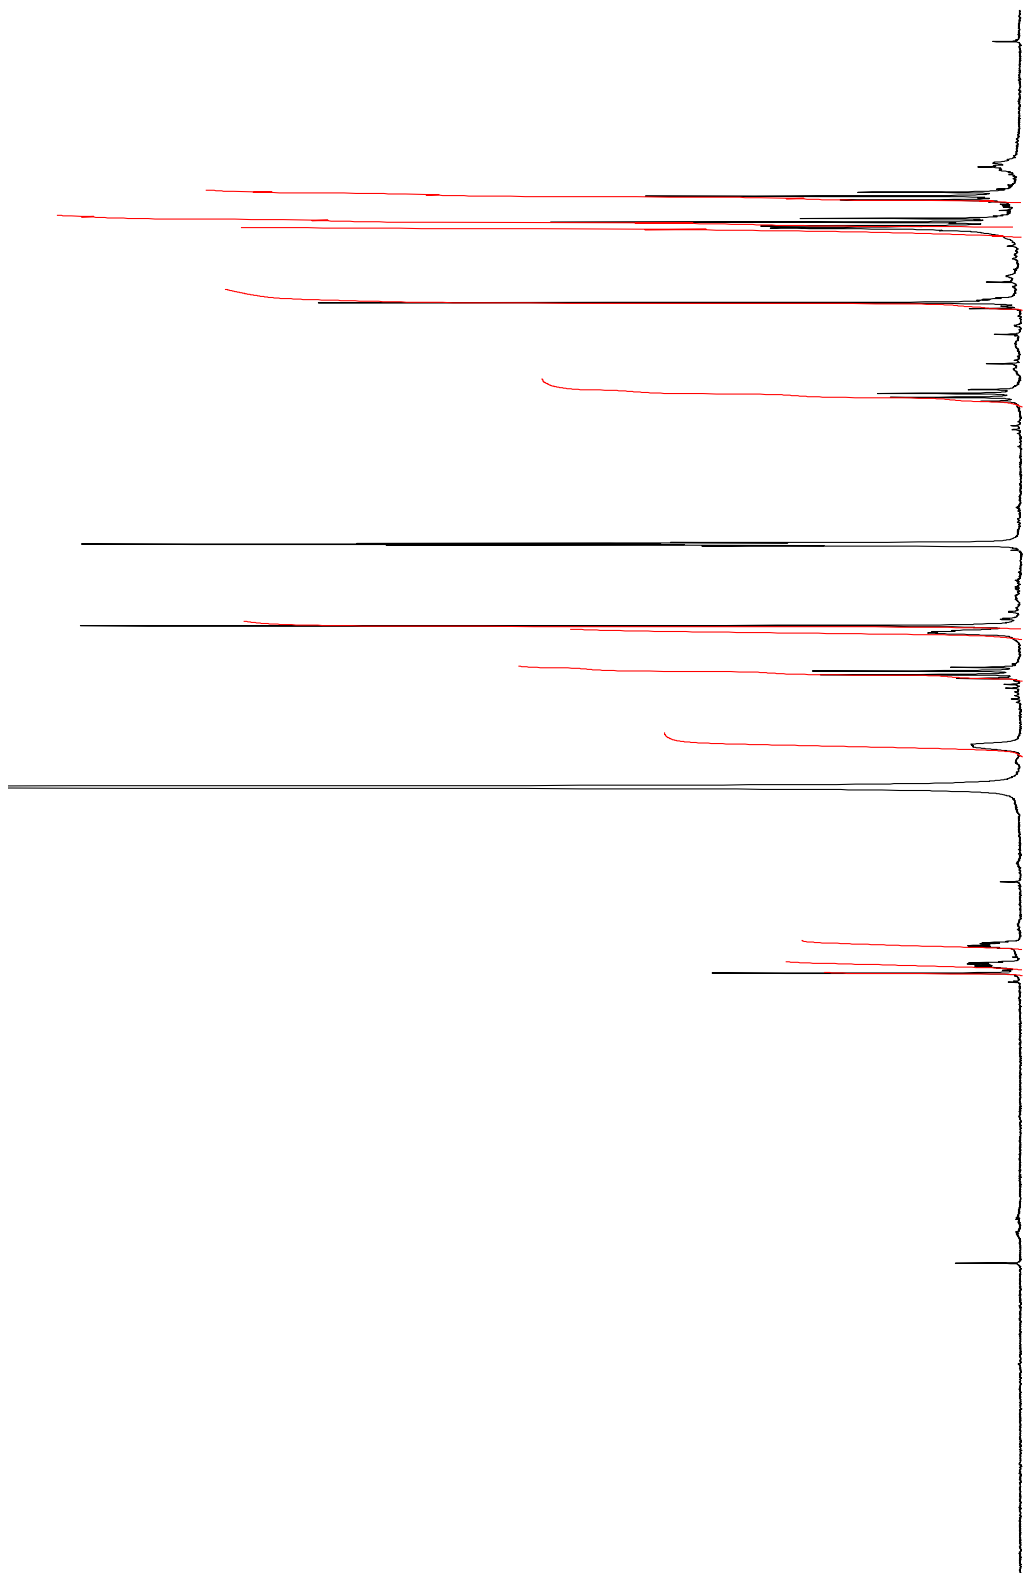

9.5 9.0 8.5 8.0 7.5 7.0 6.5 6.0 5.5 5.0 4.5 4.0 3.5 3.0 2.5 2.0 1.5 1.0 ppm

0.76  
0.91  
0.85  
1.38  
1.94  
1.74  
3.00  
1.85  
3.07  
3.01  
3.72  
3.15

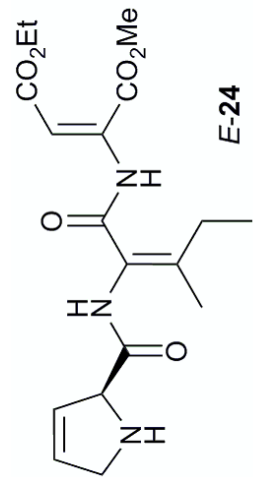

Supplement: c5cc08458j1.pdf [file c5cc08458j1.pdf]
